# Supplementary material for: Metabolome‐Based Genome‐Wide Association Study of Duck Meat Leads to Novel Genetic and Biochemical Insights
Source: PubMed Central journal article supplement (PMC10288243; doi:10.1002/advs.202300148), 2023-04-04

## Supporting Information

for *Adv. Sci.*, DOI 10.1002/advs.202300148

Metabolome-Based Genome-Wide Association Study of Duck Meat Leads to Novel Genetic and Biochemical Insights

*Dapeng Liu, He Zhang, Youyou Yang, Tong Liu, Zhanbao Guo, Wenlei Fan, Zhen Wang, Xinting Yang, Bo Zhang, Hongfei Liu, Hehe Tang, Daxin Yu, Simeng Yu, Kai Gai, Qiming Mou, Juntong Cao, Jian Hu, Jing Tang, Shuisheng Hou\* and Zhengkui Zhou\**

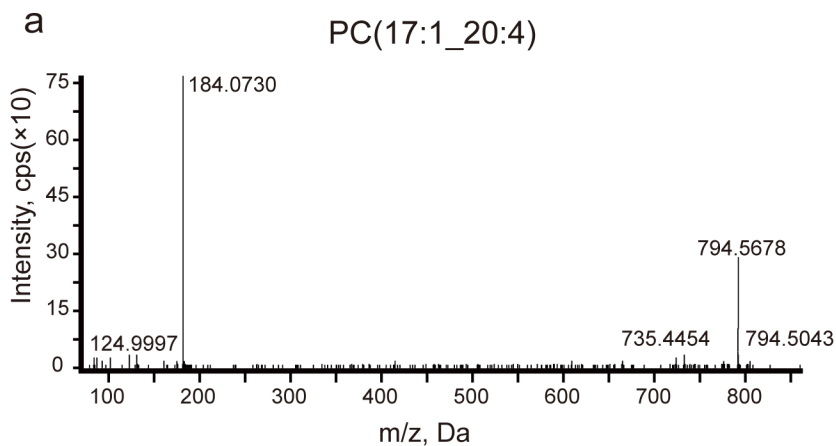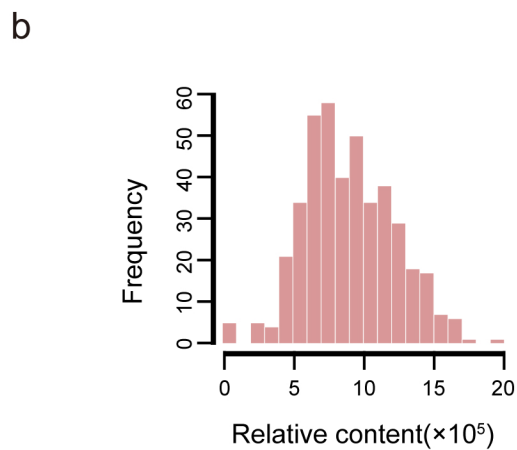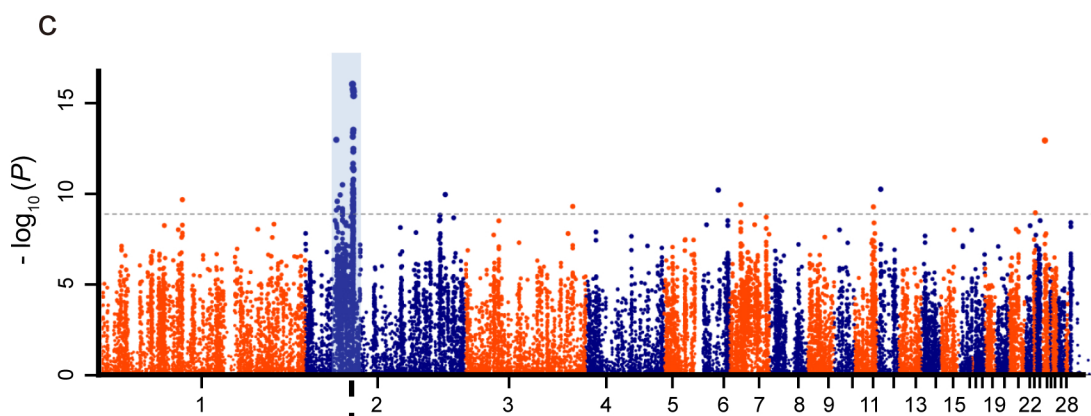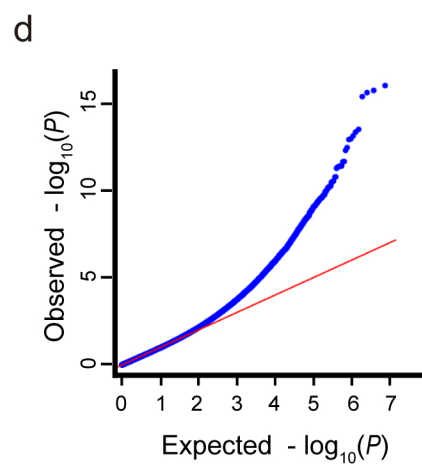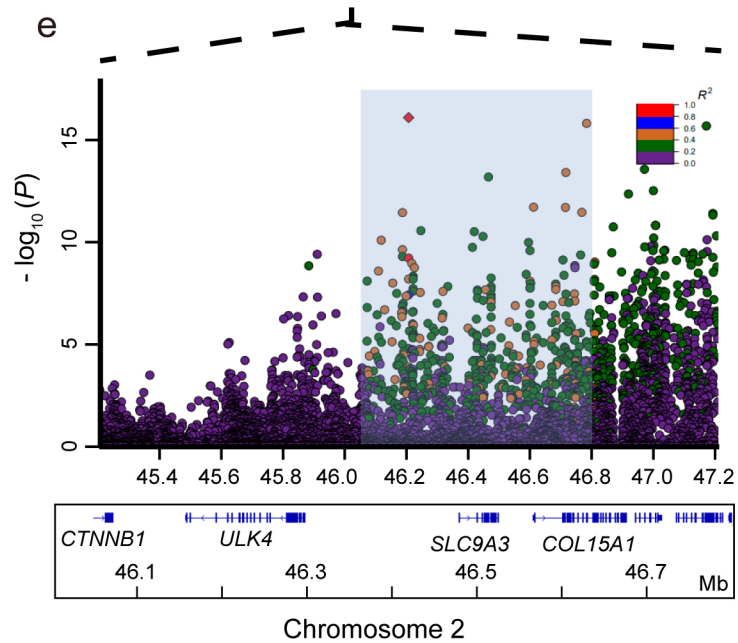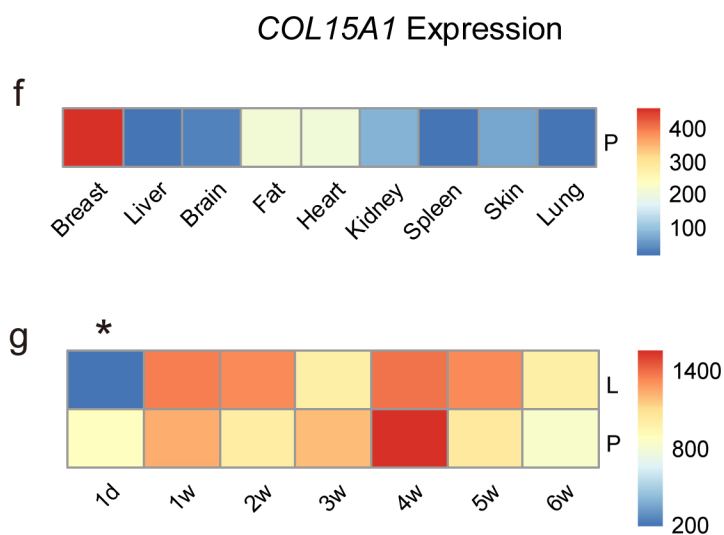



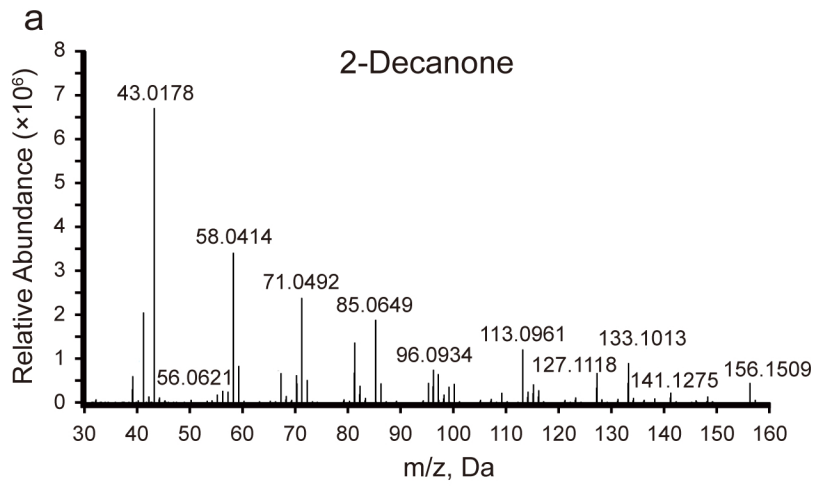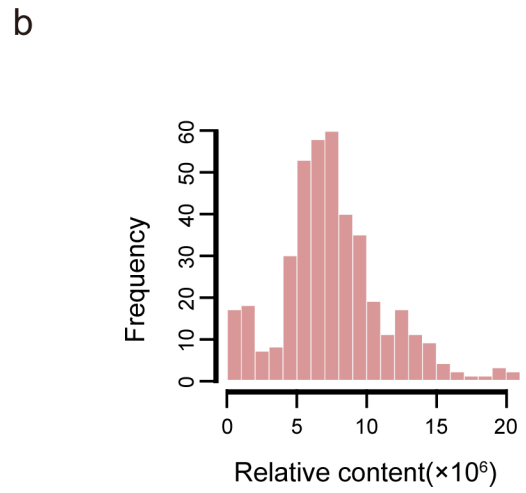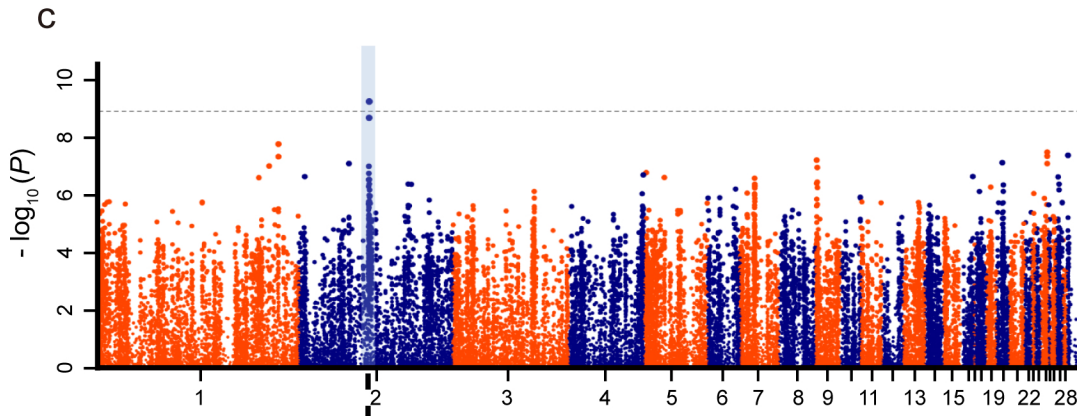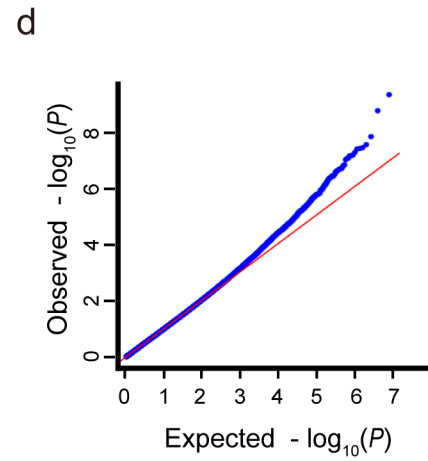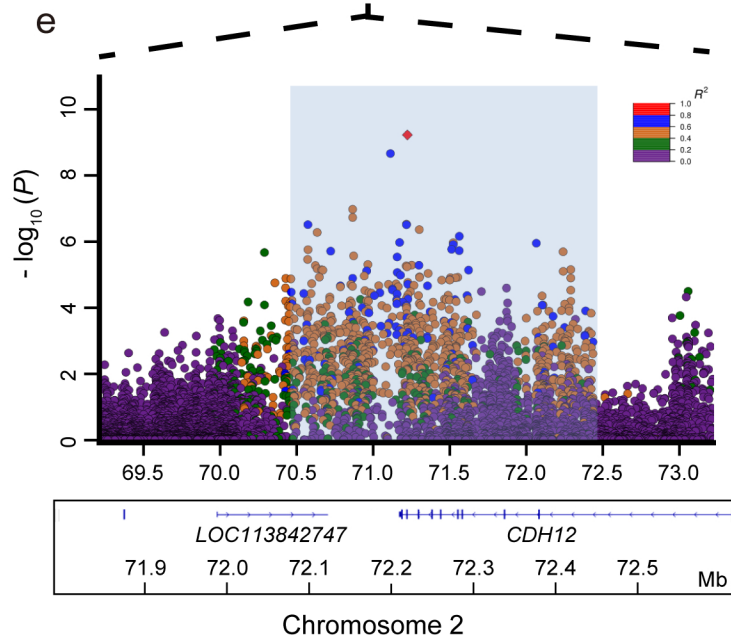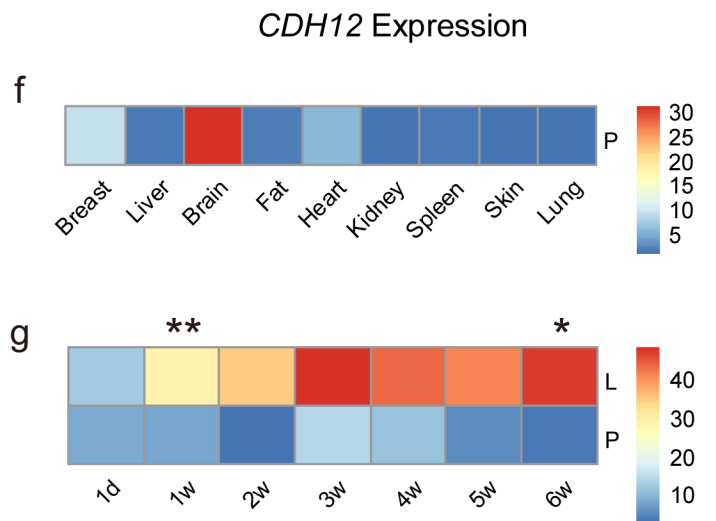

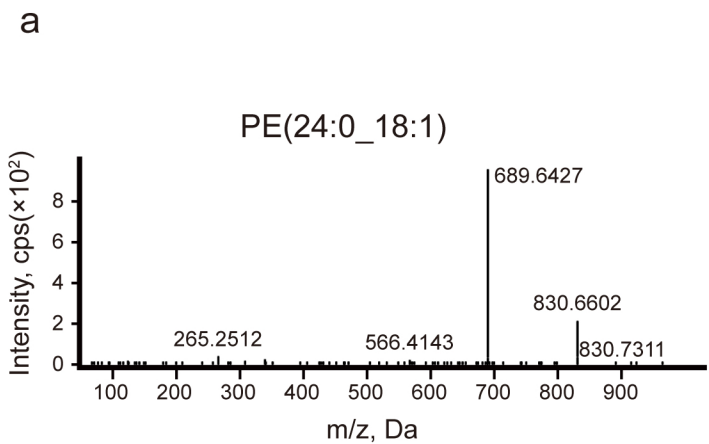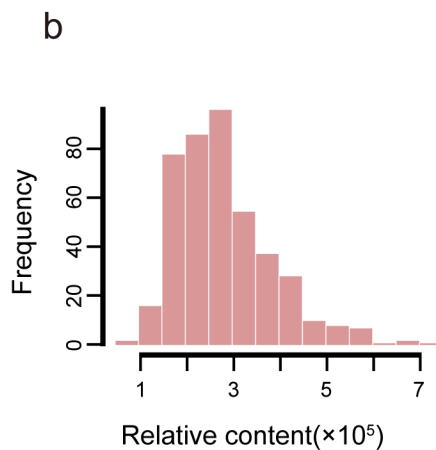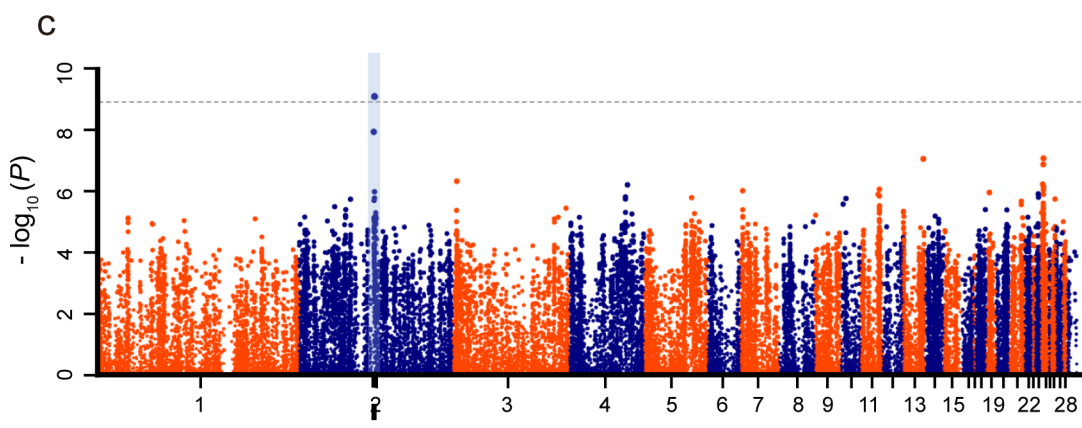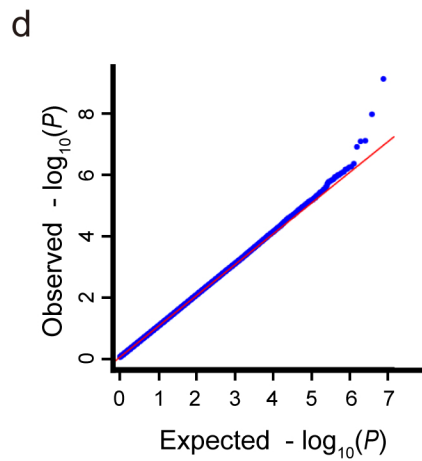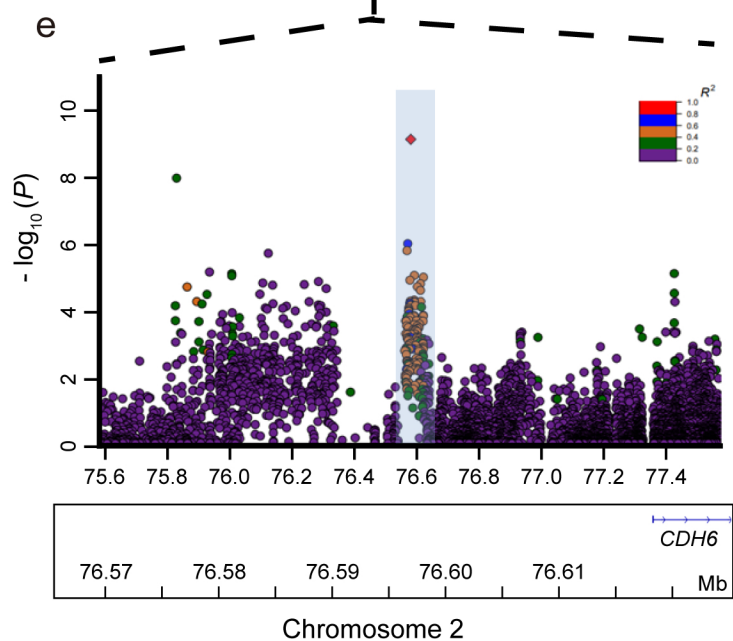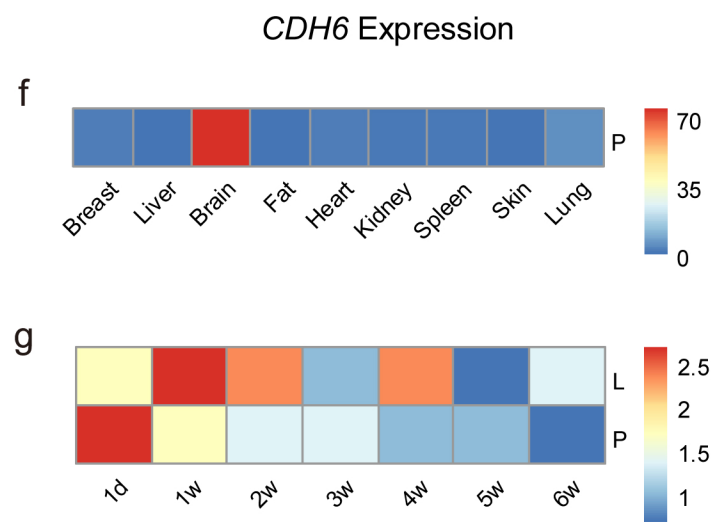

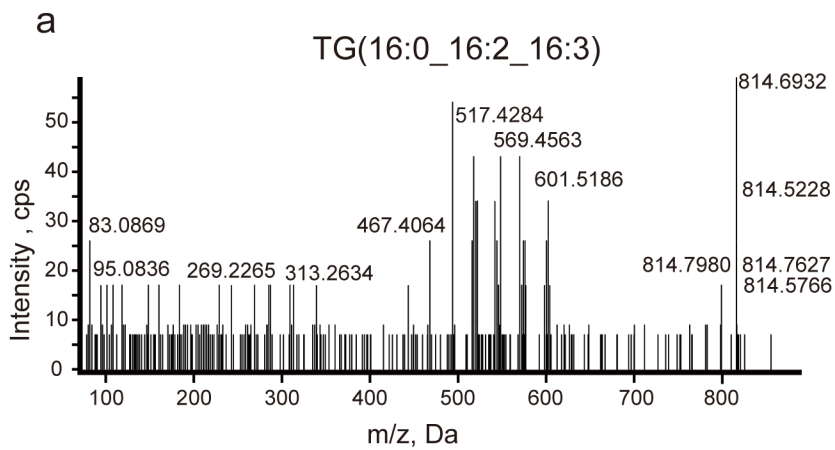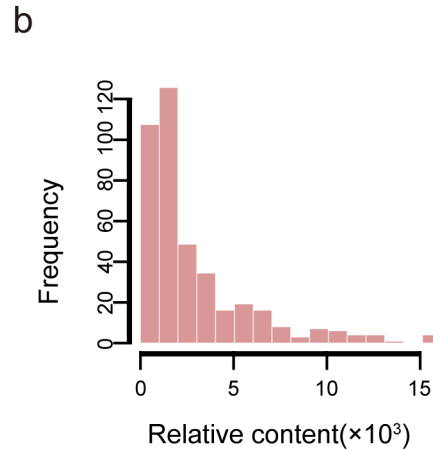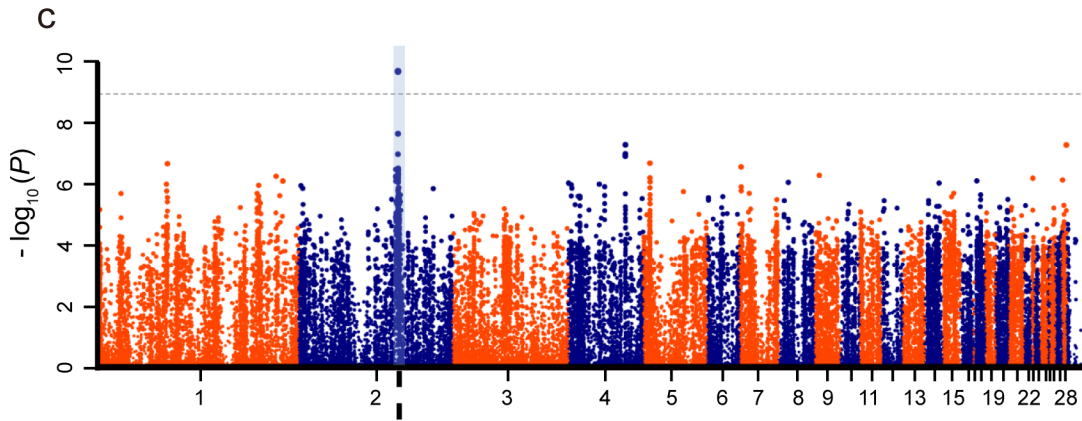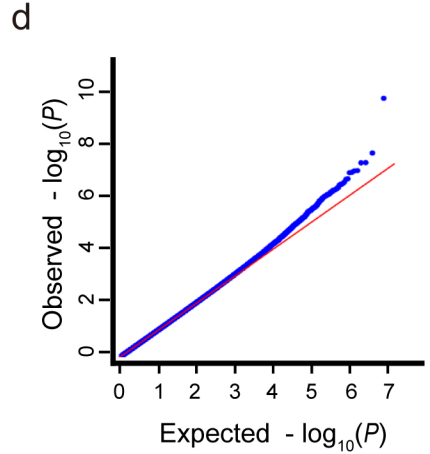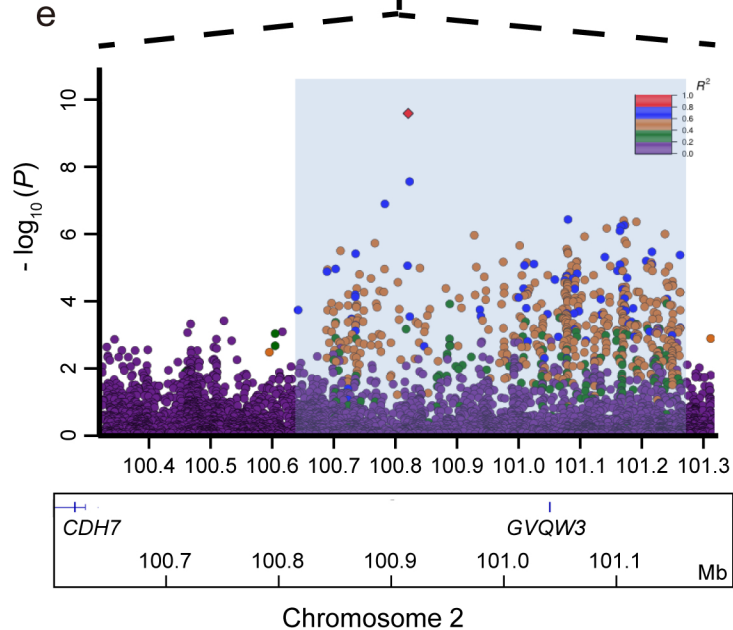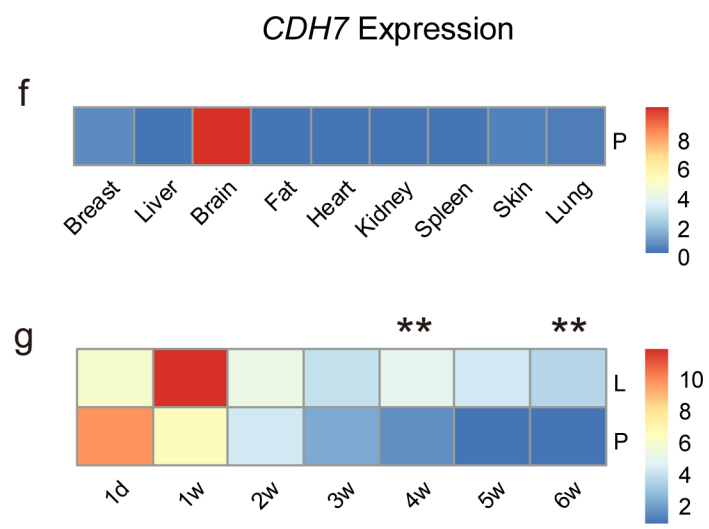

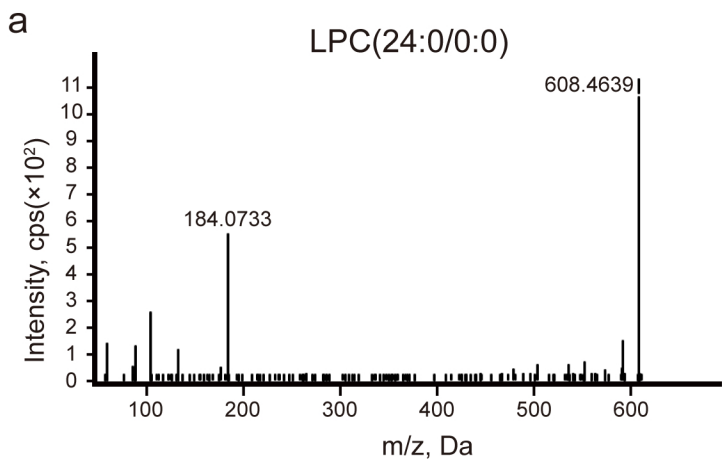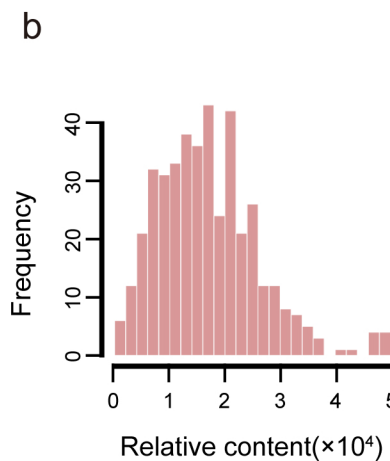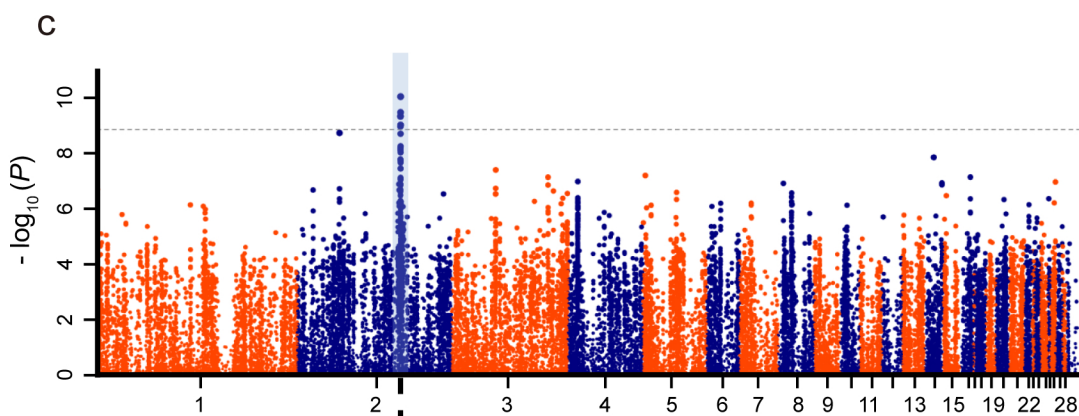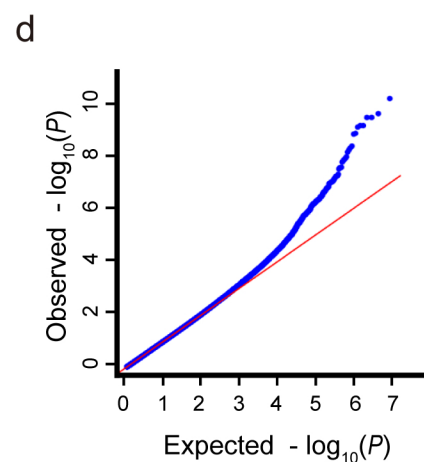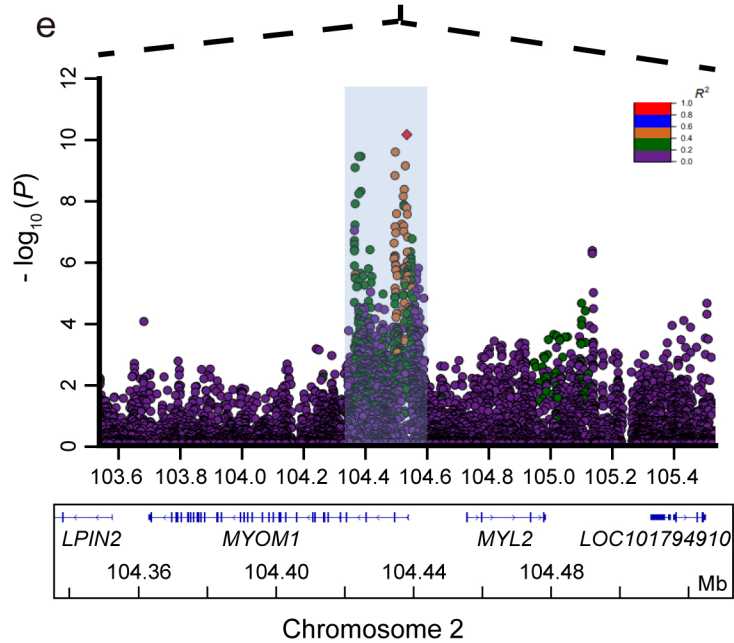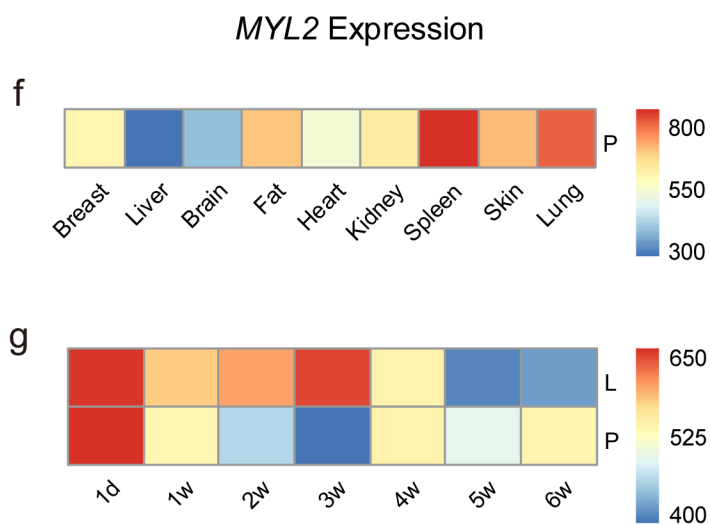

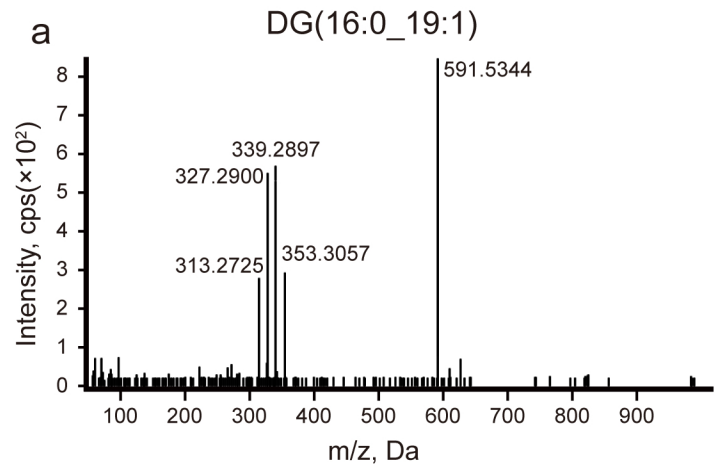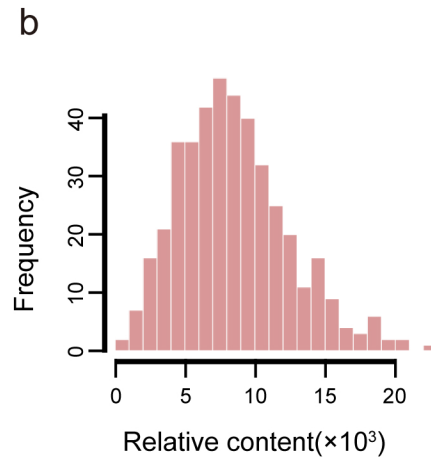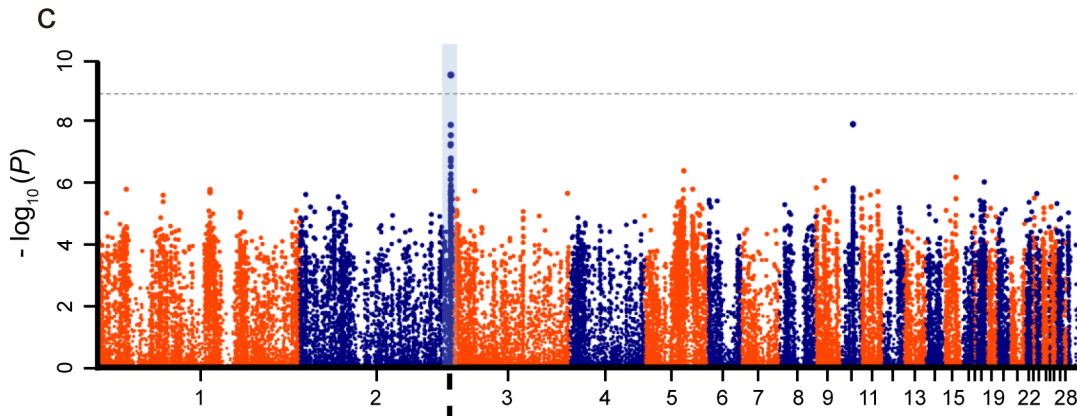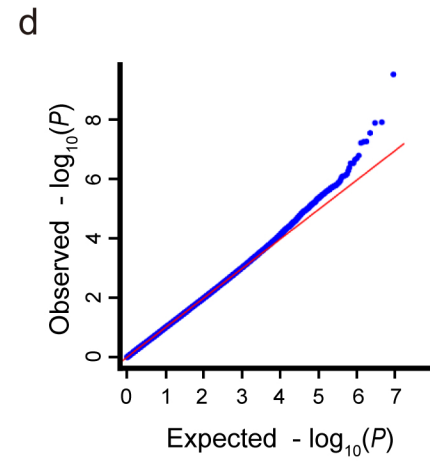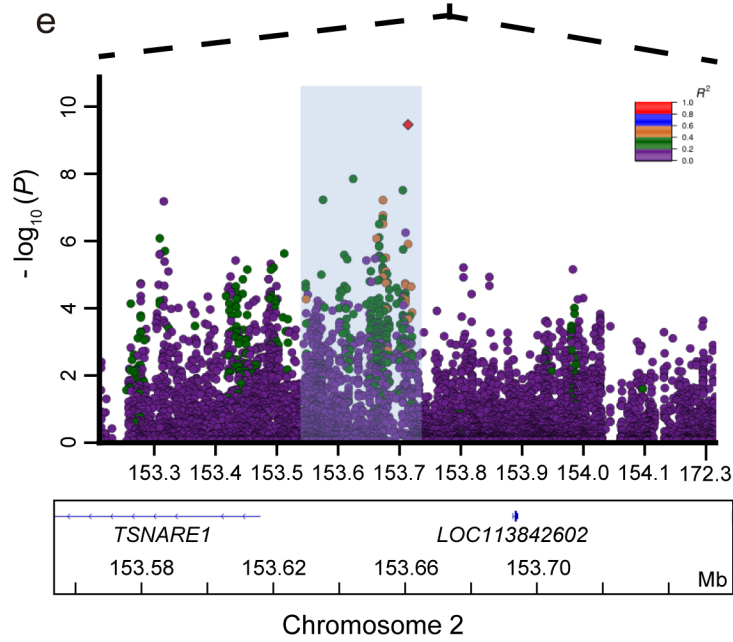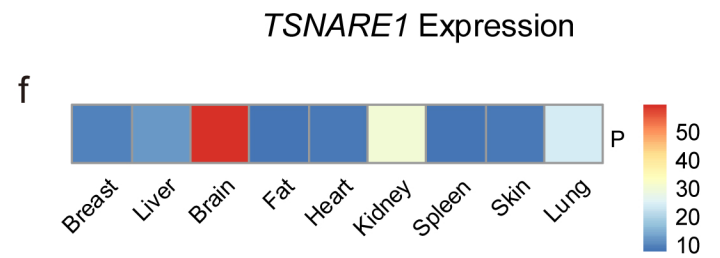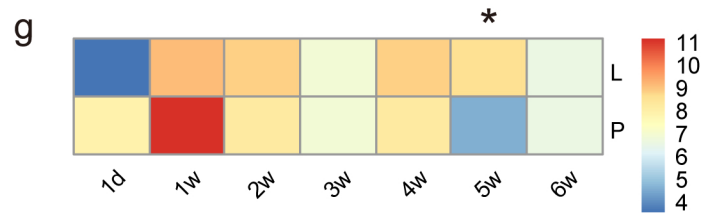



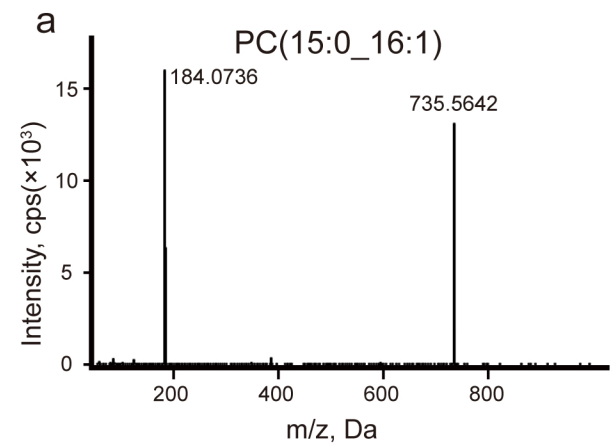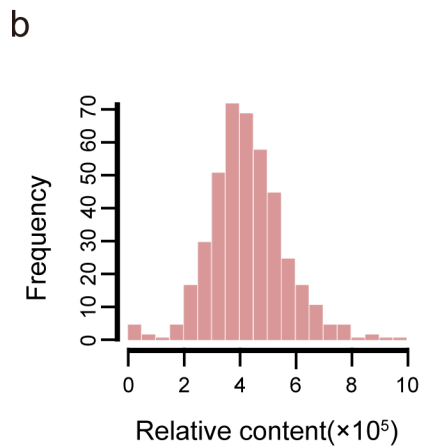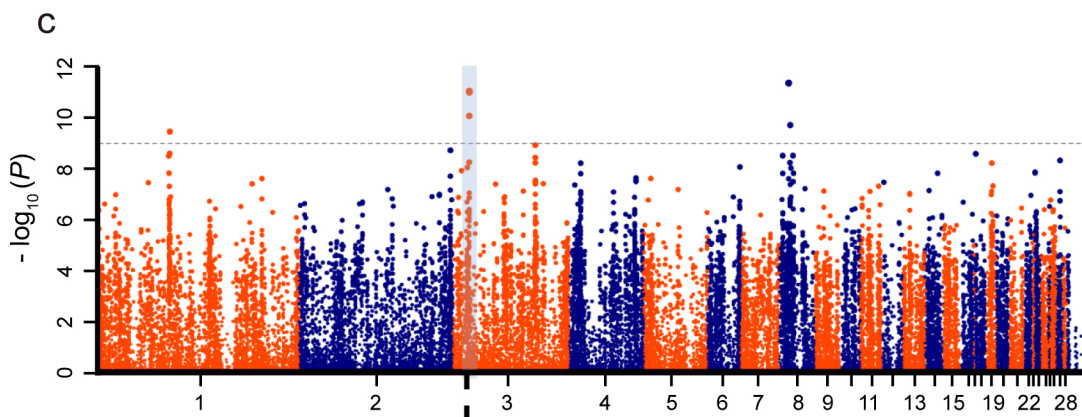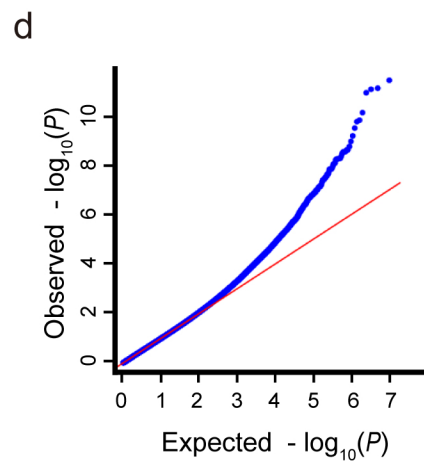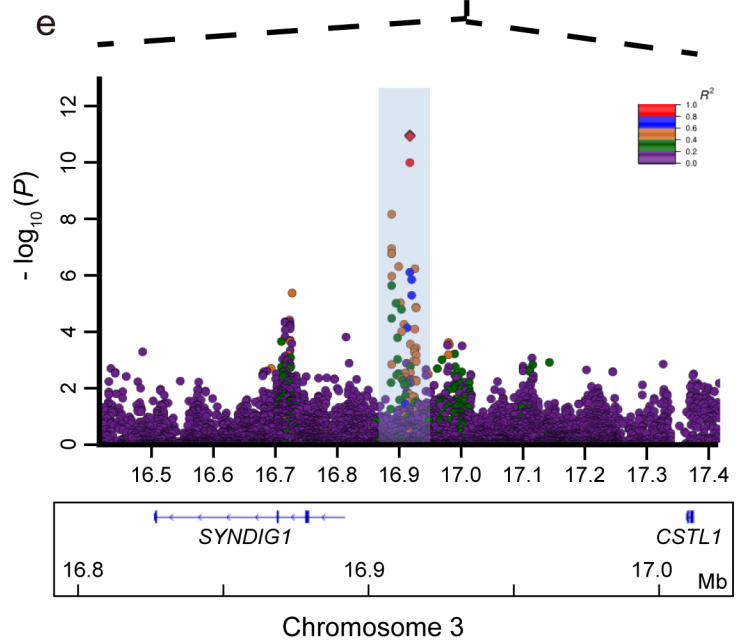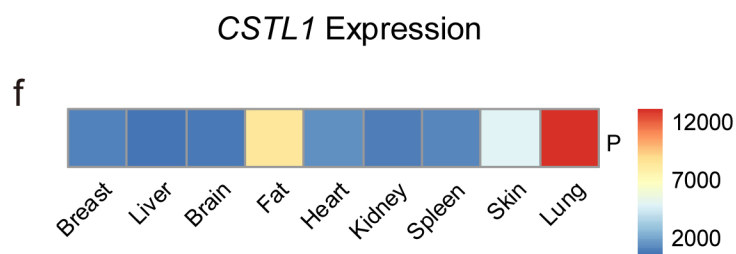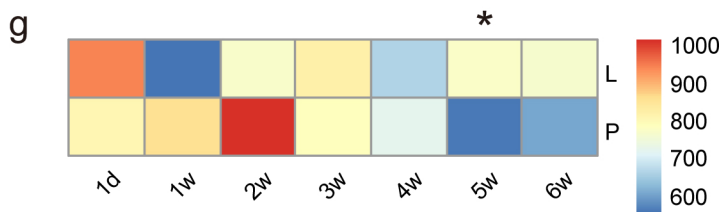

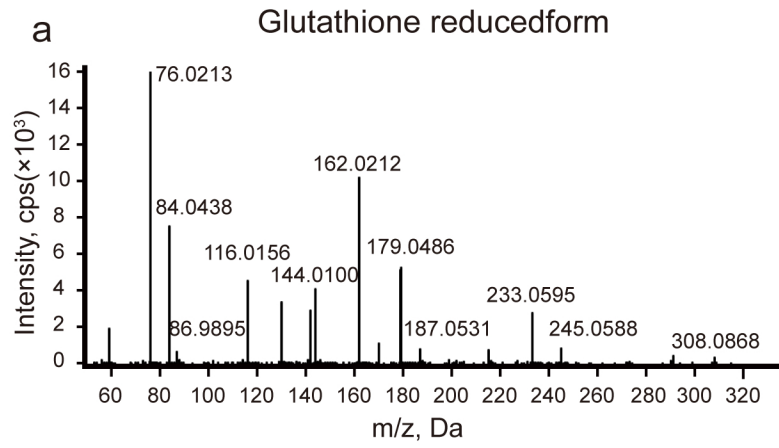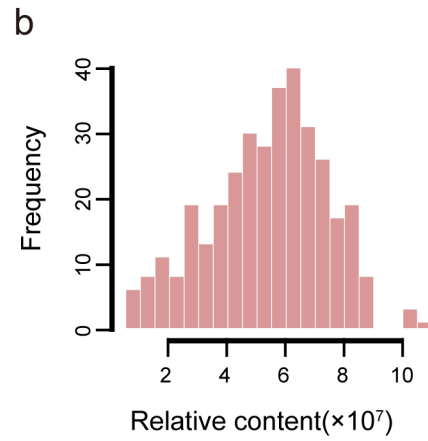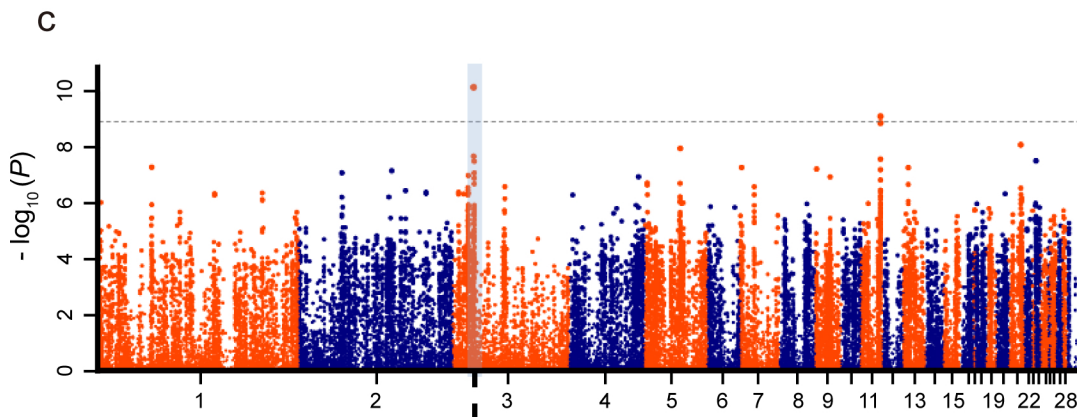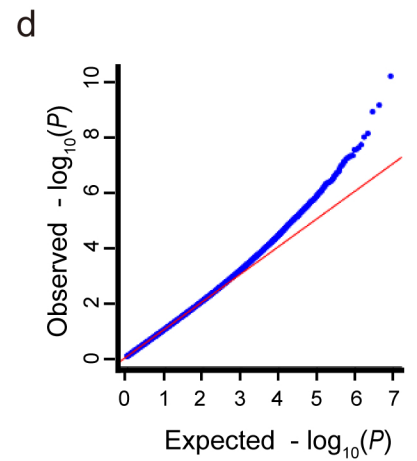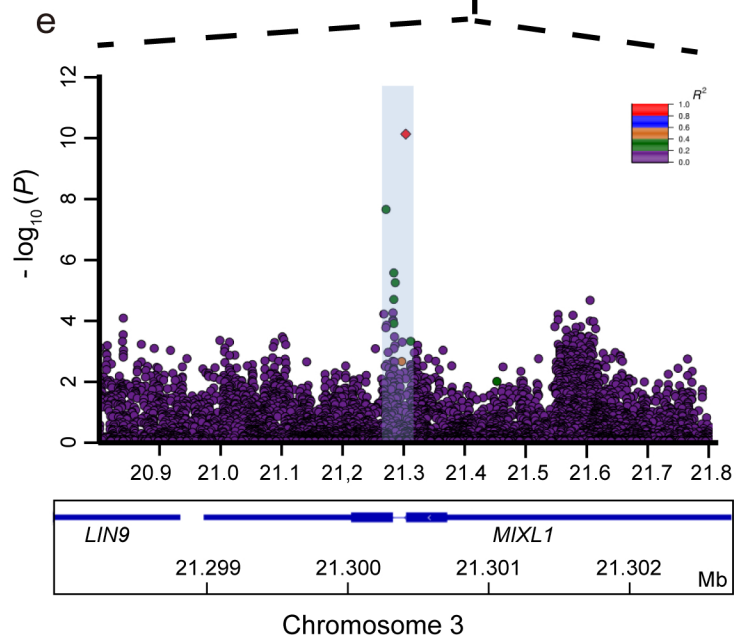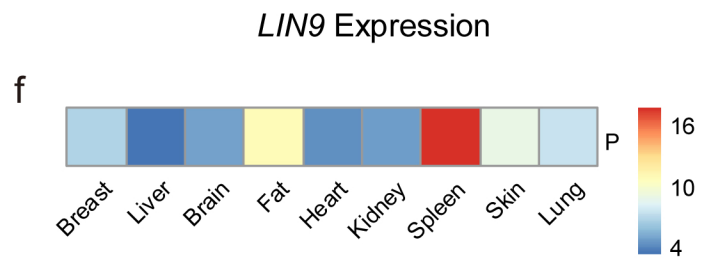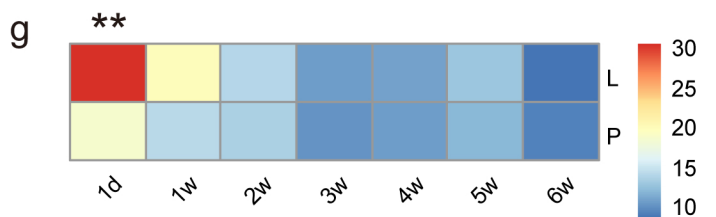

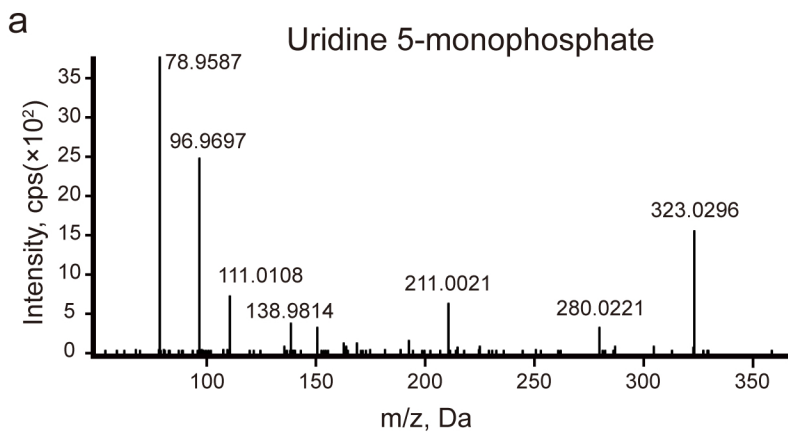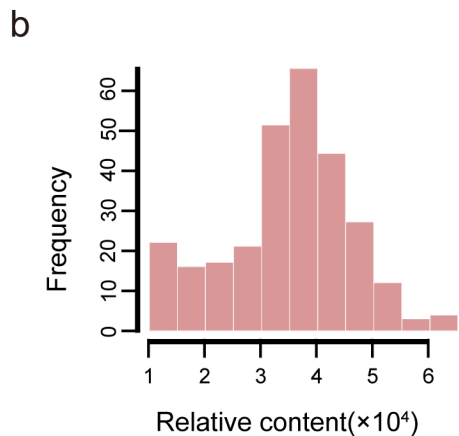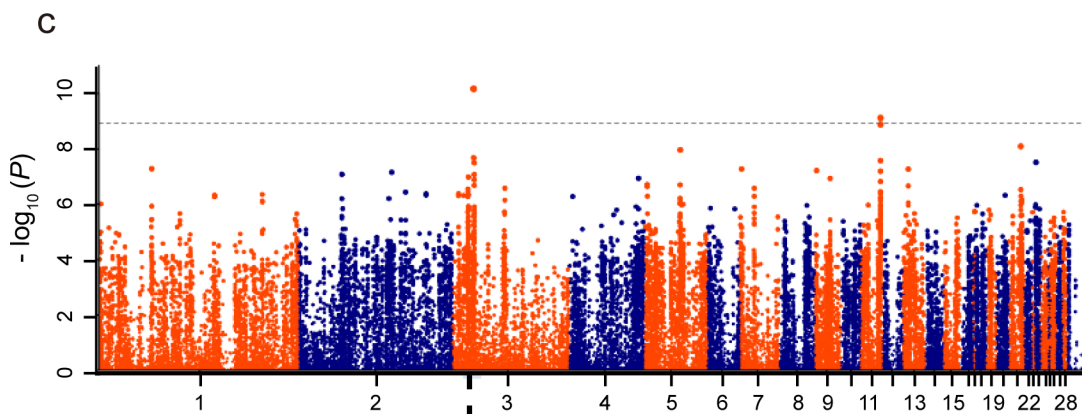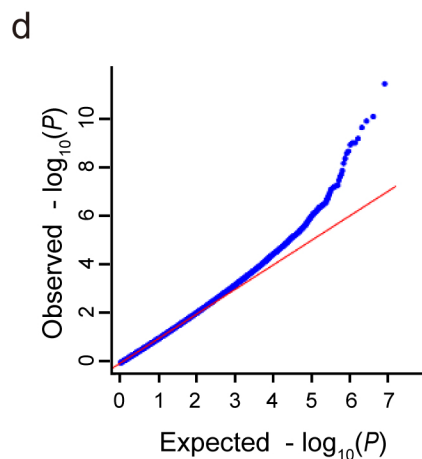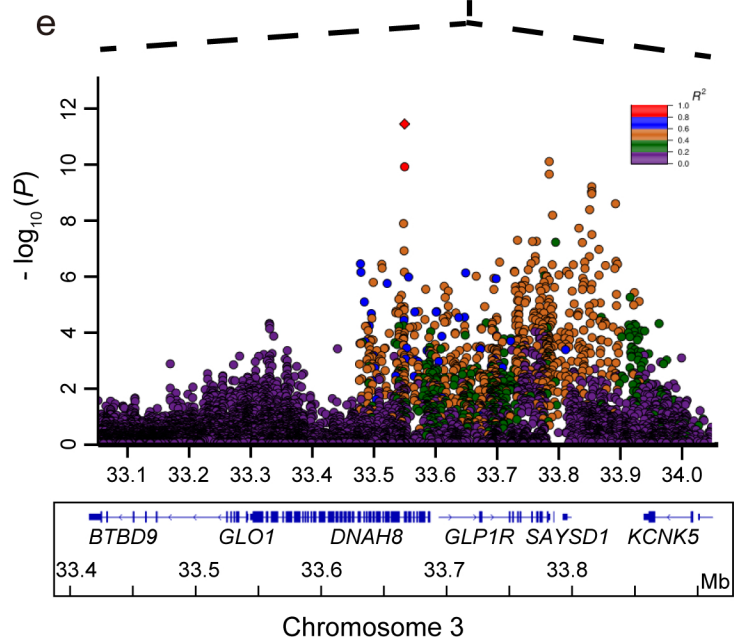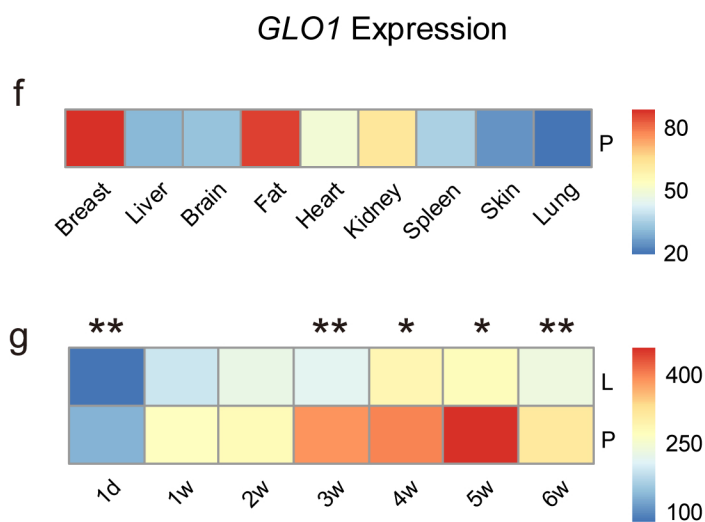



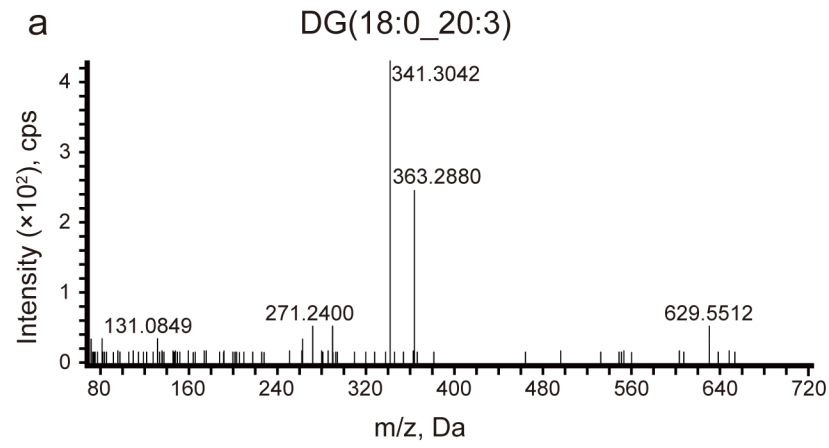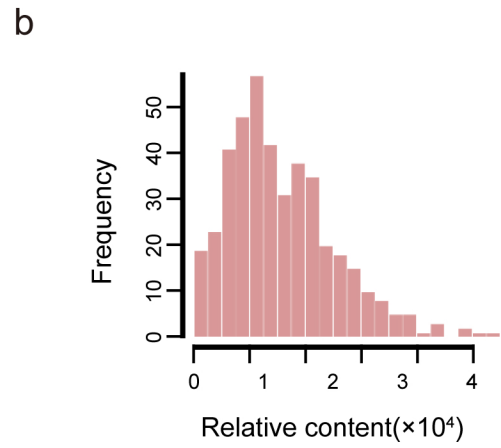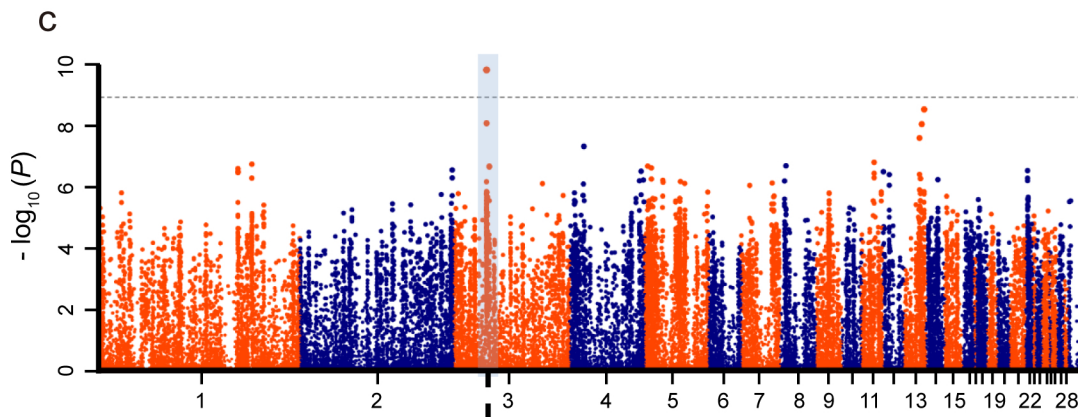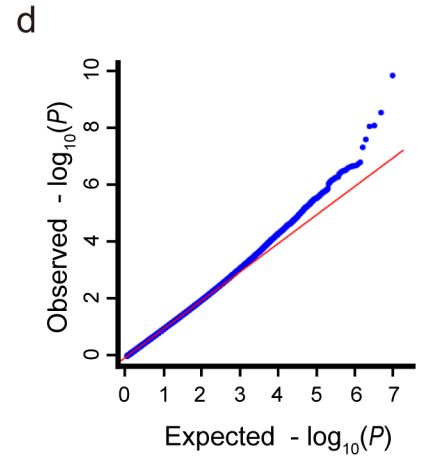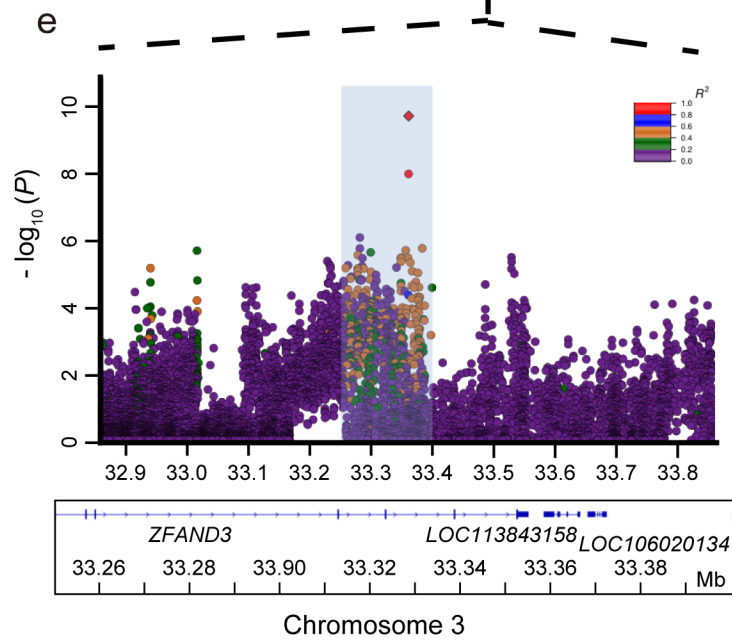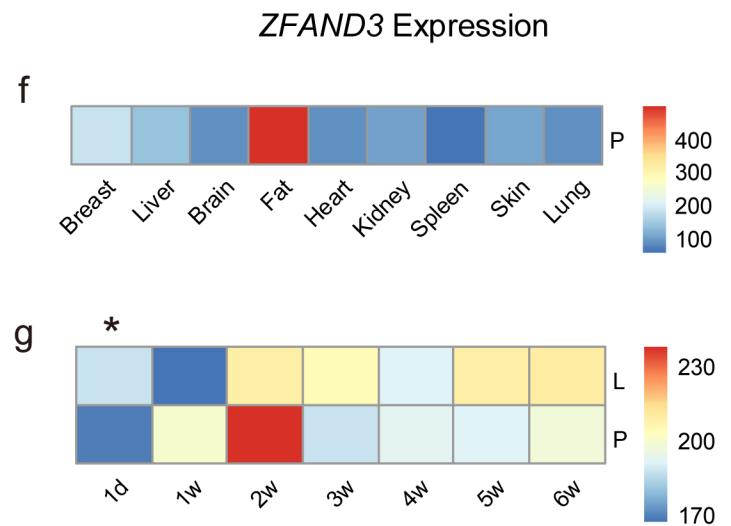

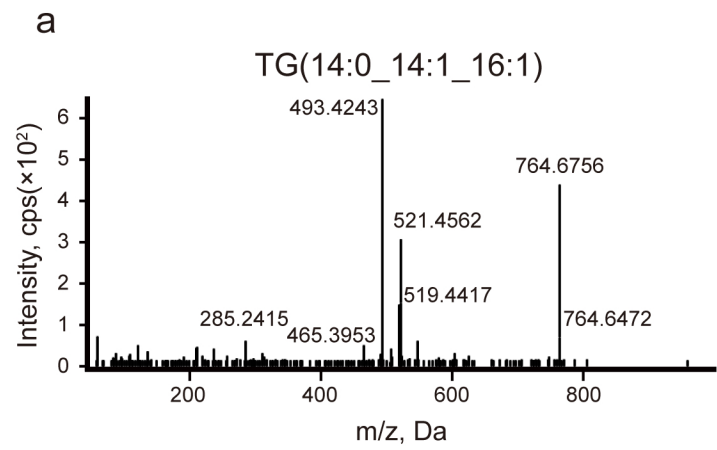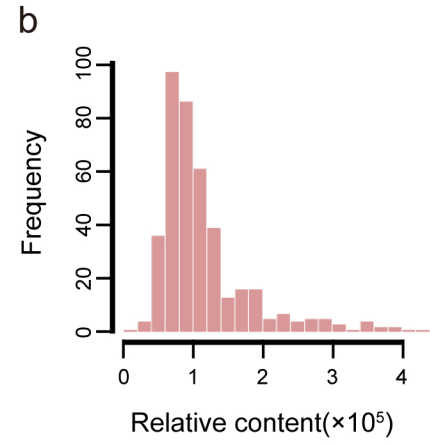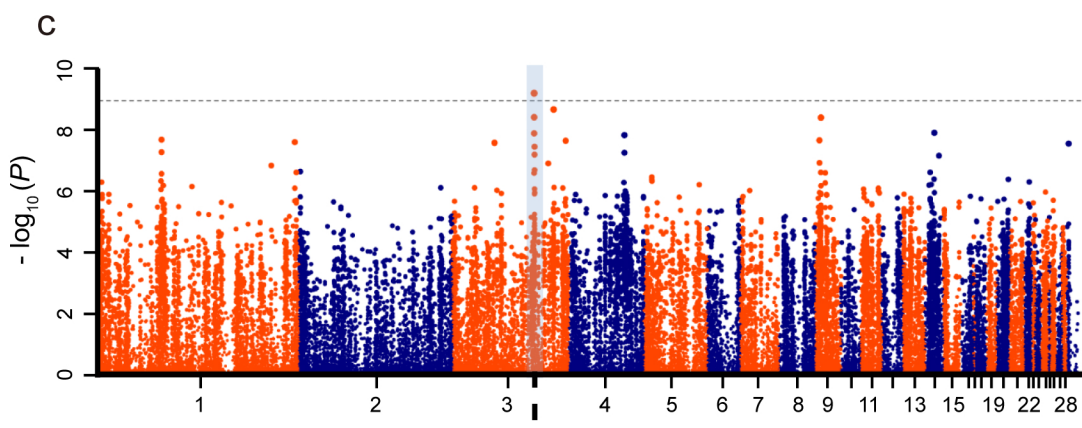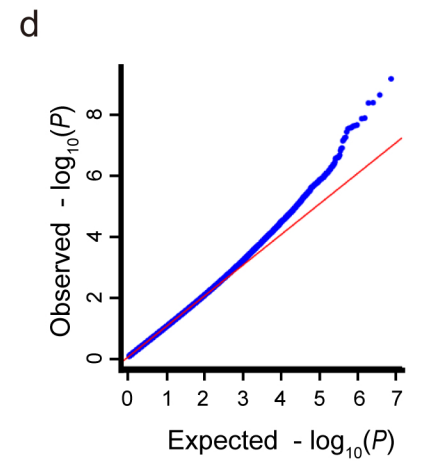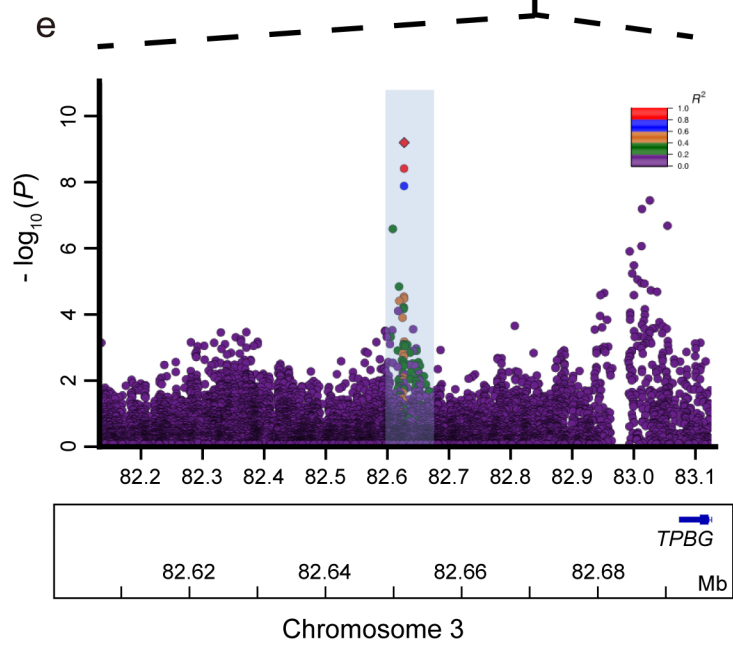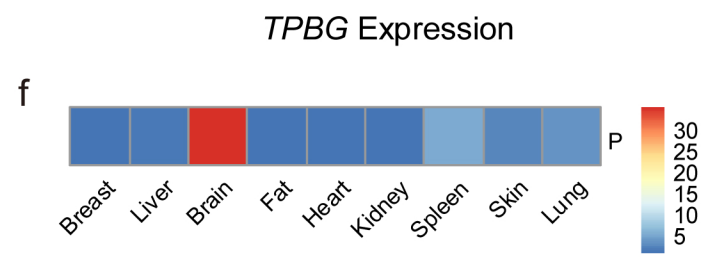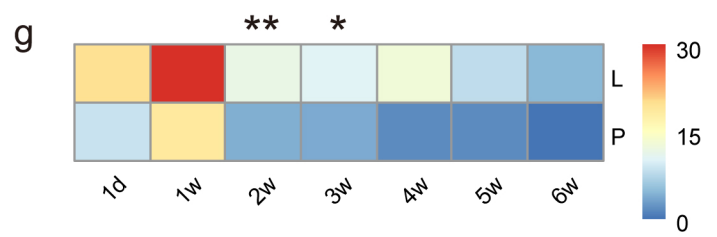

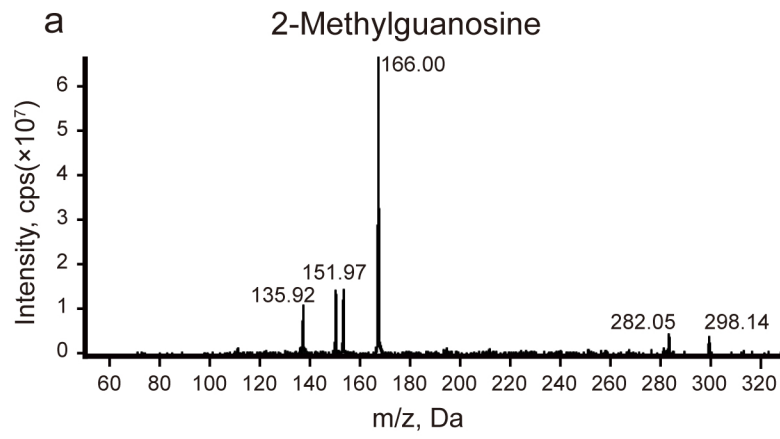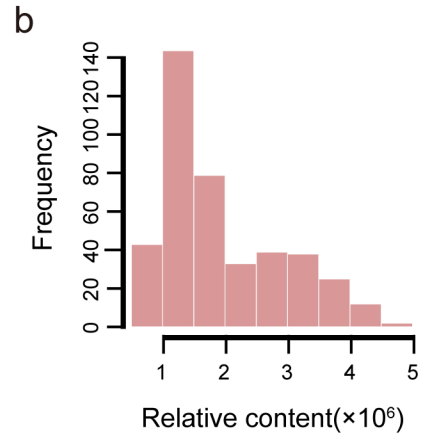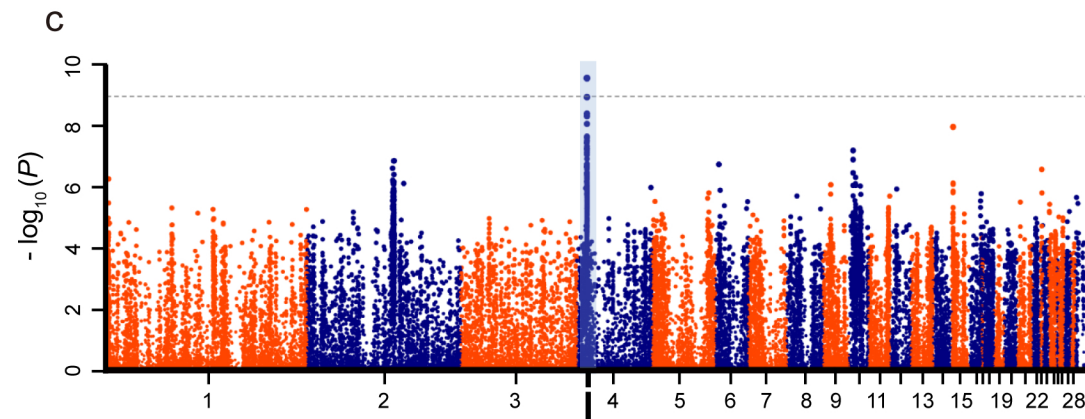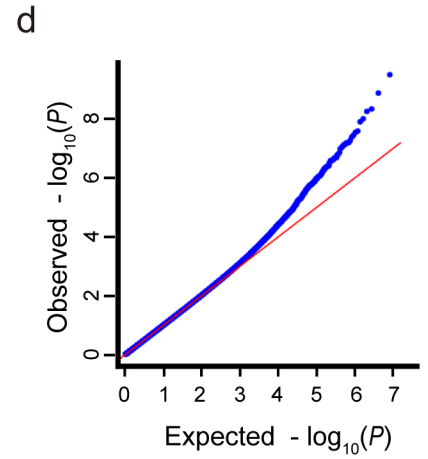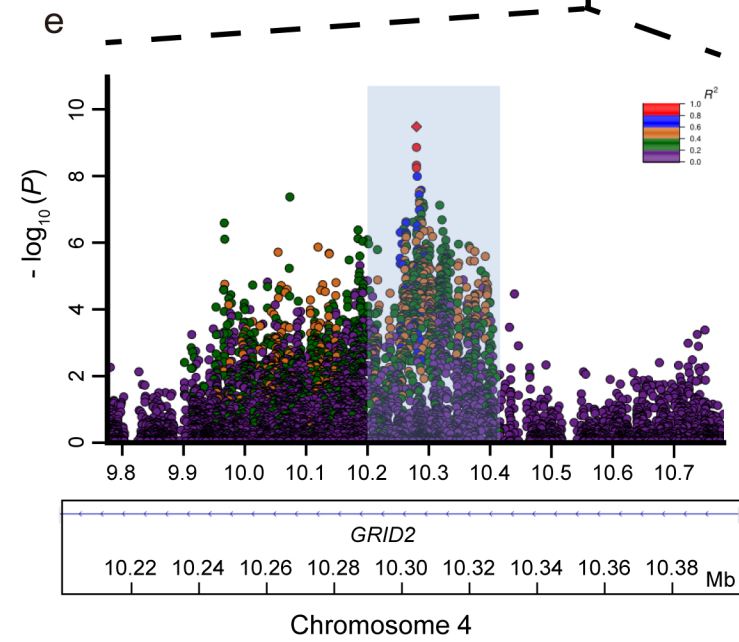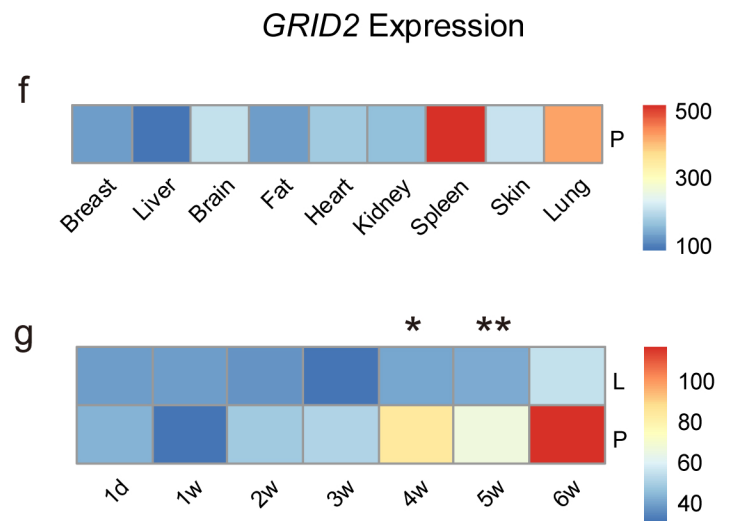

Supplement: ADVS-10-2300148-s003.pdf [file ADVS-10-2300148-s003.pdf]
