# Supplementary material for: Metabolome‐Based Genome‐Wide Association Study of Duck Meat Leads to Novel Genetic and Biochemical Insights
Source: PubMed Central journal article supplement (PMC10288243; doi:10.1002/advs.202300148), 2023-04-04
Supplement: ADVS-10-2300148-s002.pdf [file ADVS-10-2300148-s002.pdf]

## Supporting Information

for *Adv. Sci.*, DOI 10.1002/advs.202300148

Metabolome-Based Genome-Wide Association Study of Duck Meat Leads to Novel Genetic and Biochemical Insights

*Dapeng Liu, He Zhang, Youyou Yang, Tong Liu, Zhanbao Guo, Wenlei Fan, Zhen Wang, Xinting Yang, Bo Zhang, Hongfei Liu, Hehe Tang, Daxin Yu, Simeng Yu, Kai Gai, Qiming Mou, Junting Cao, Jian Hu, Jing Tang, Shuisheng Hou\* and Zhengkui Zhou\**

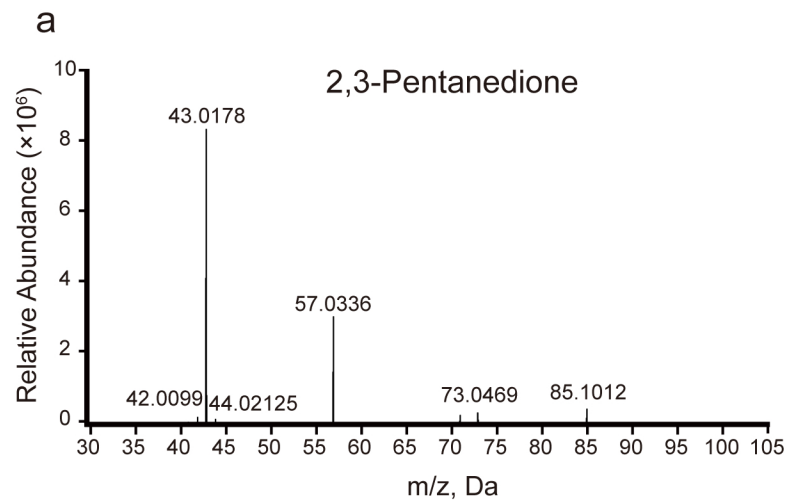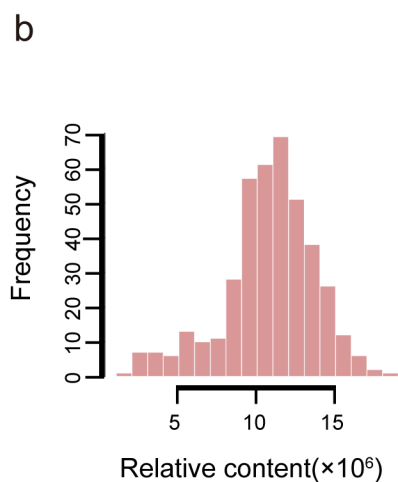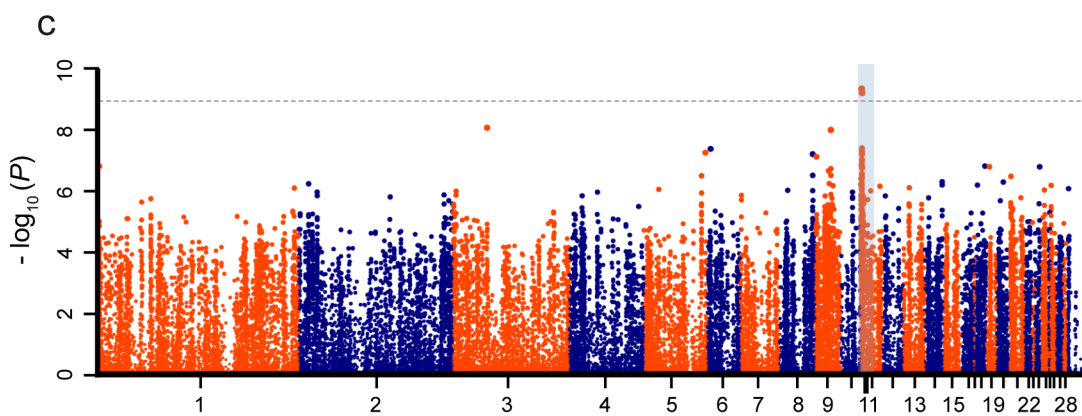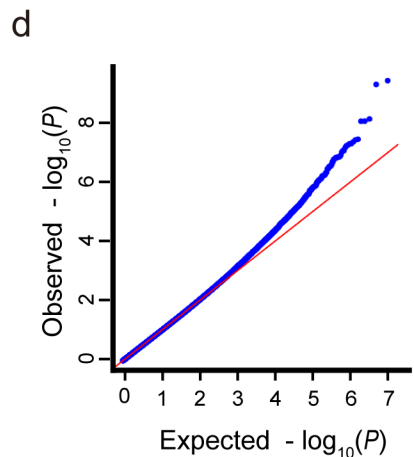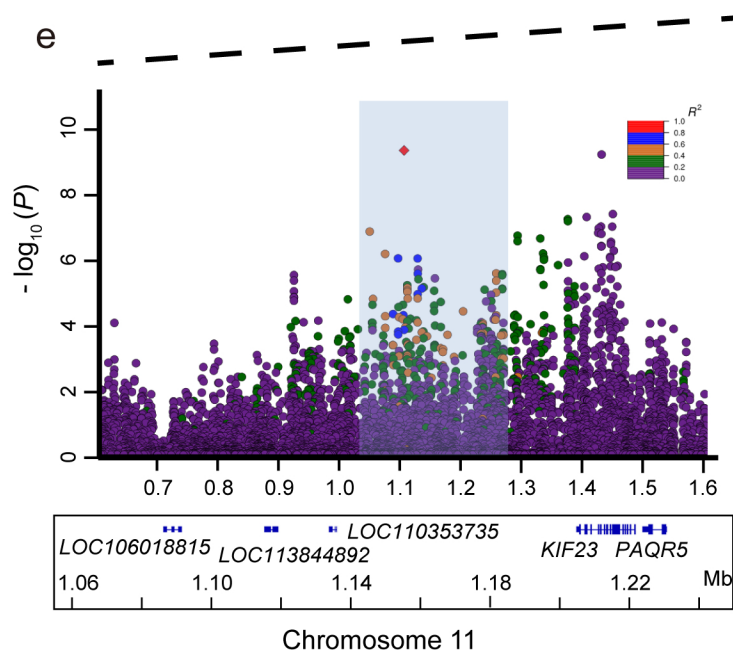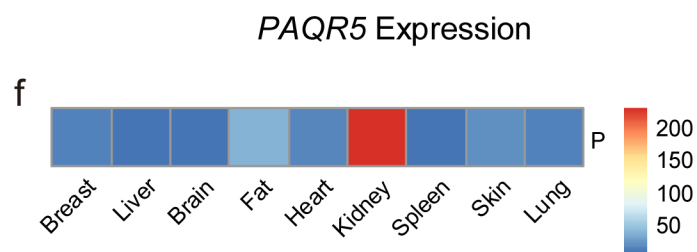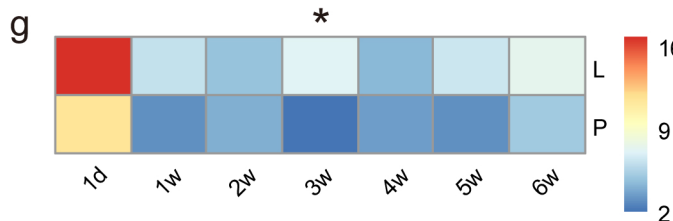

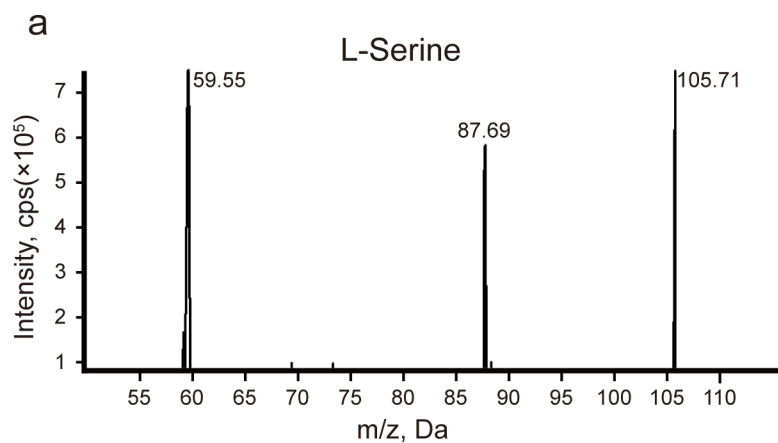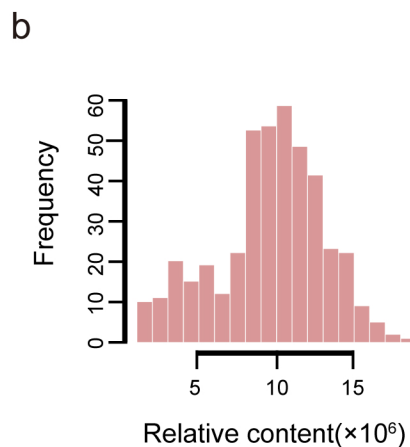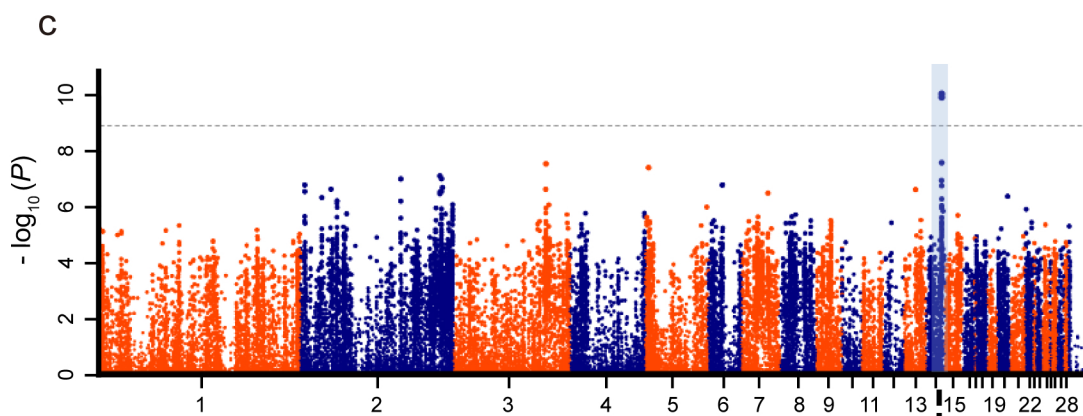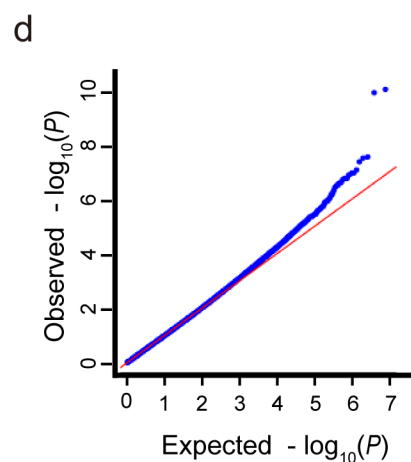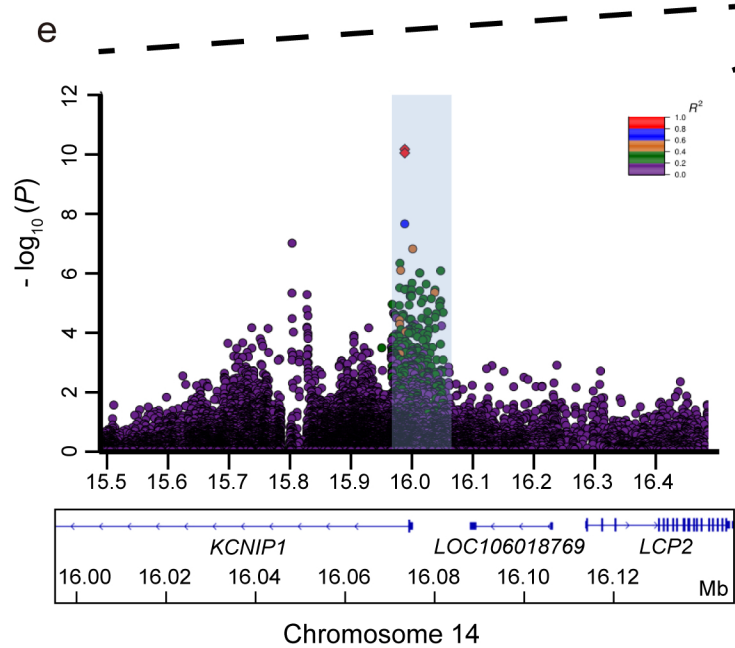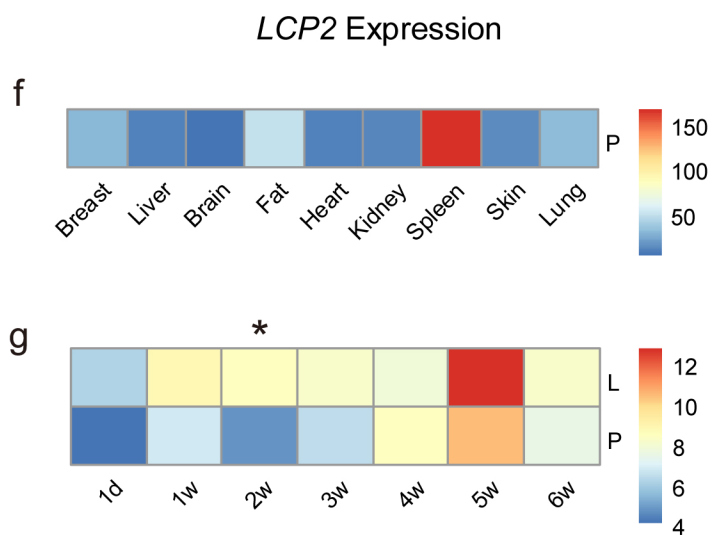

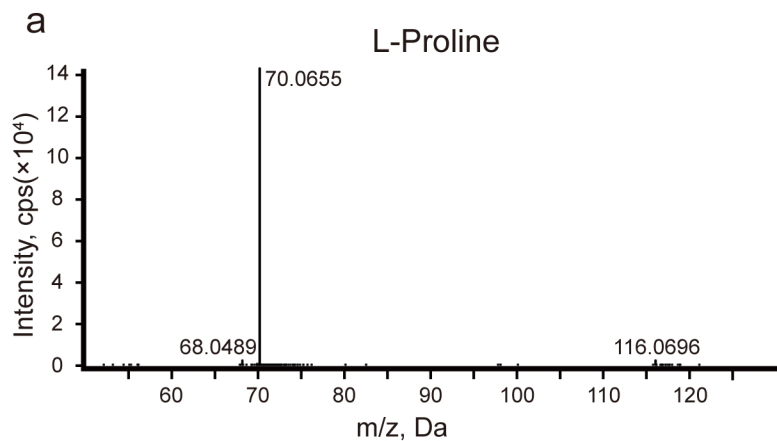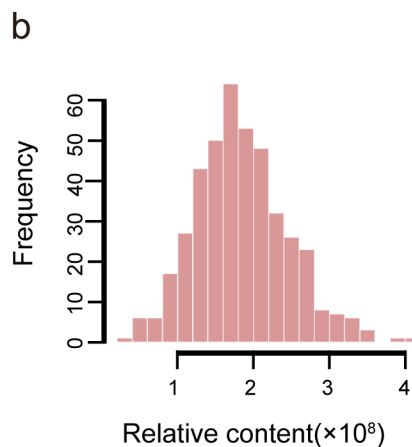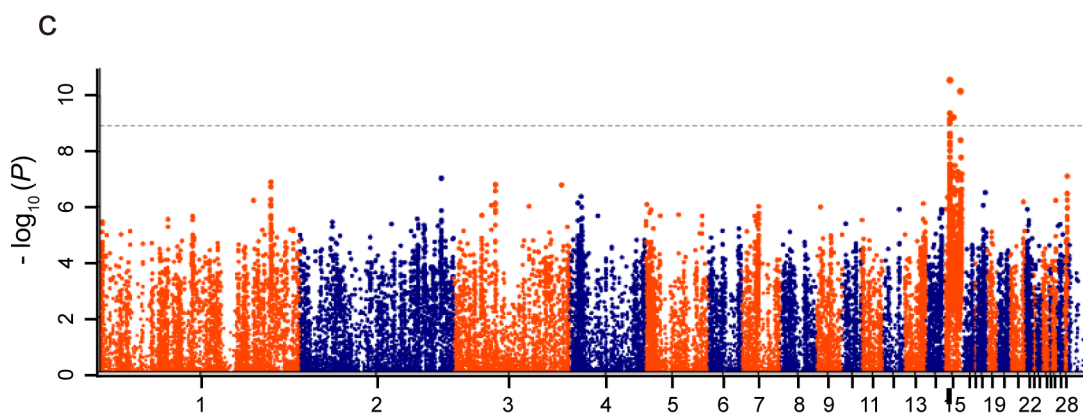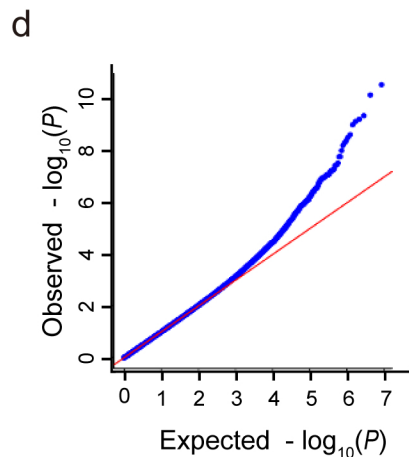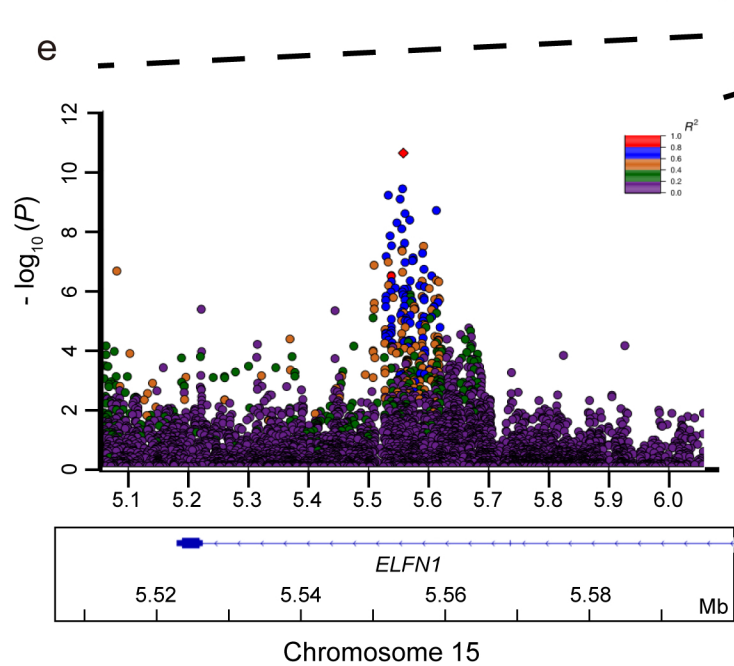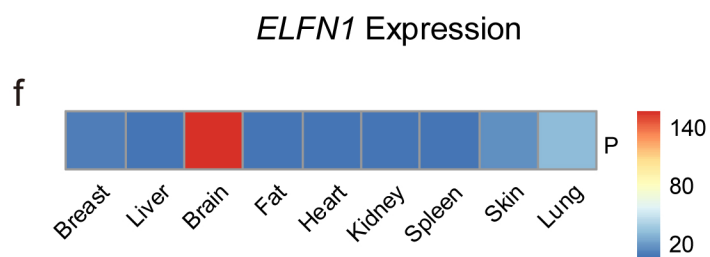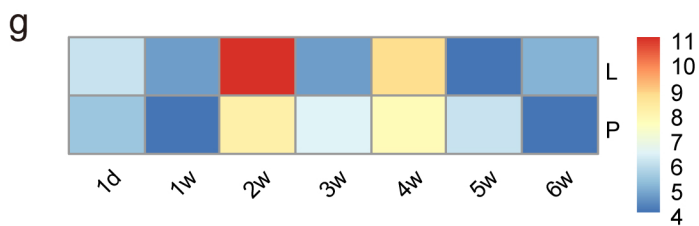



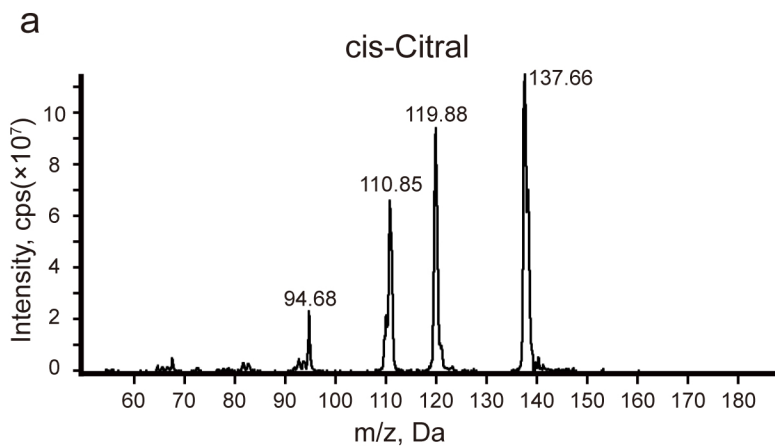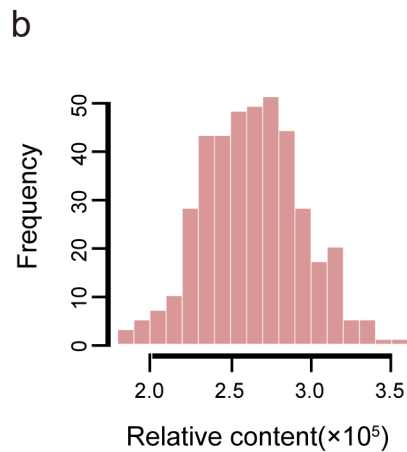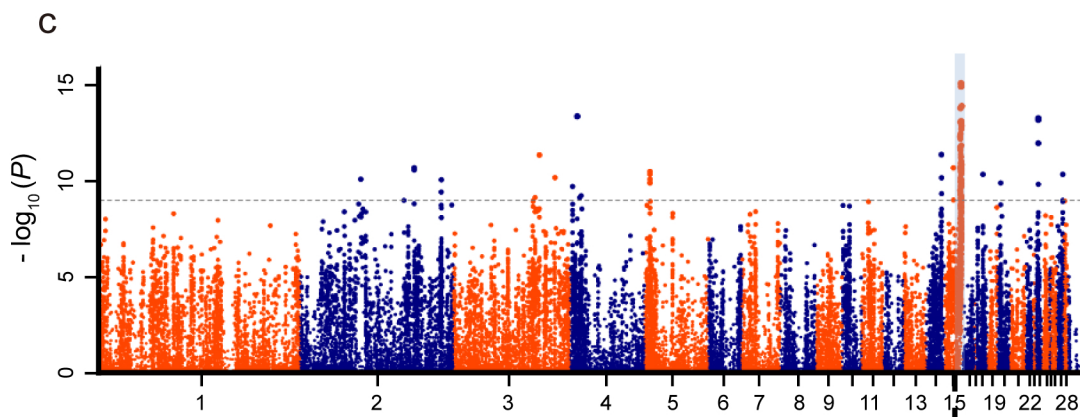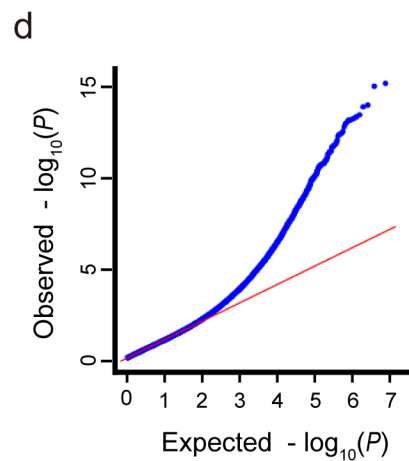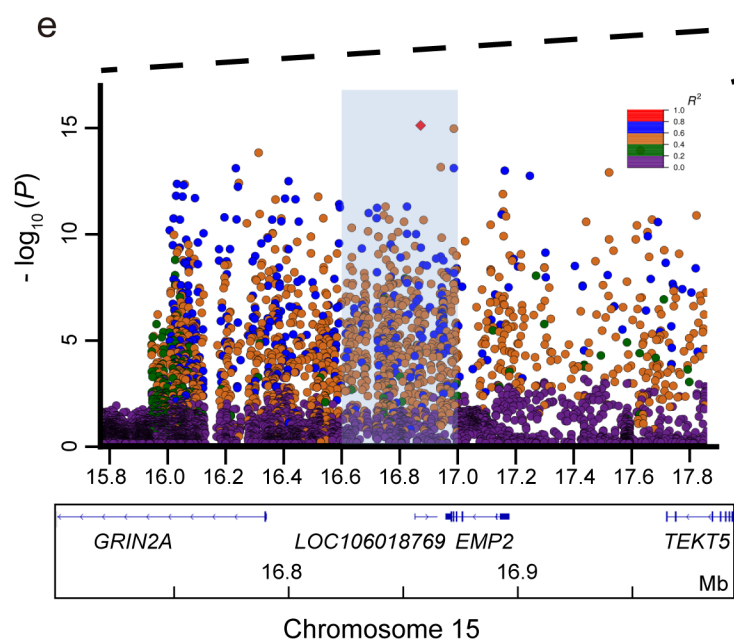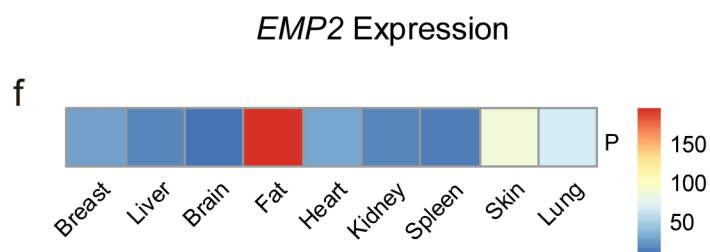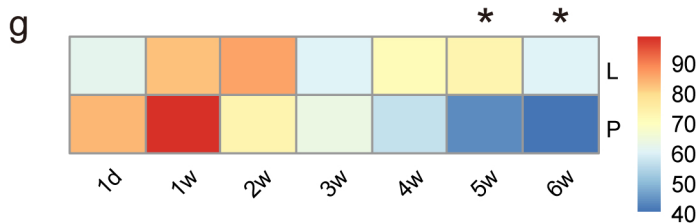

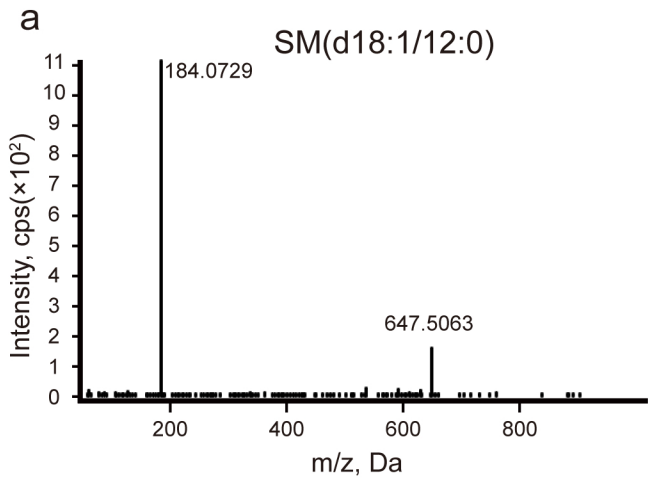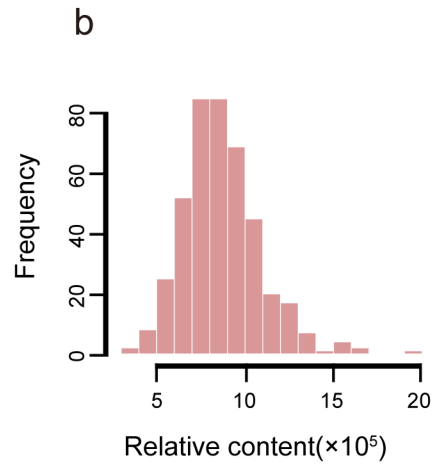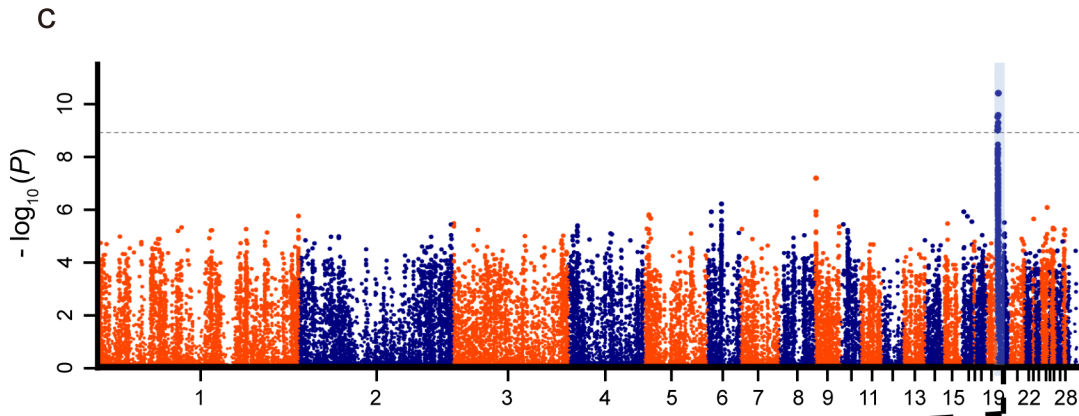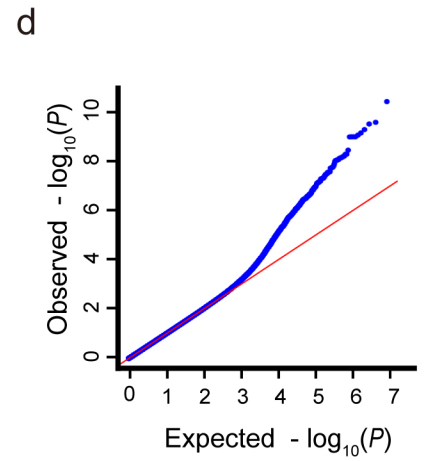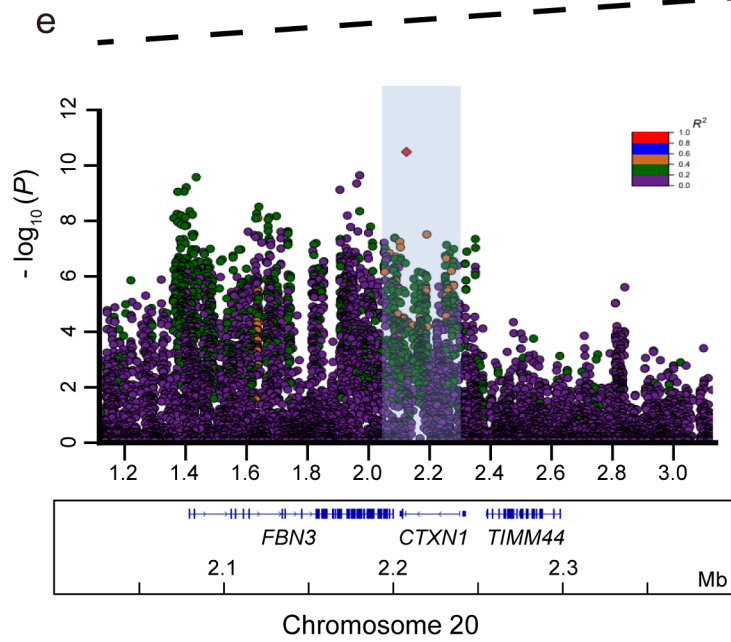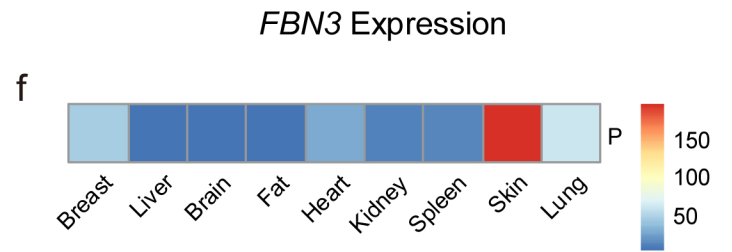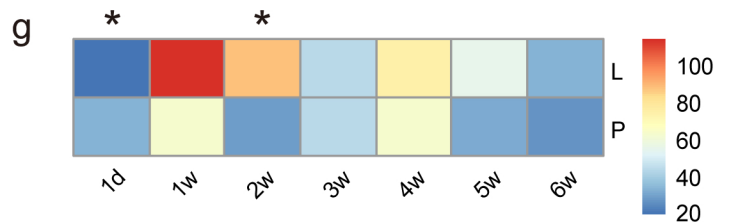

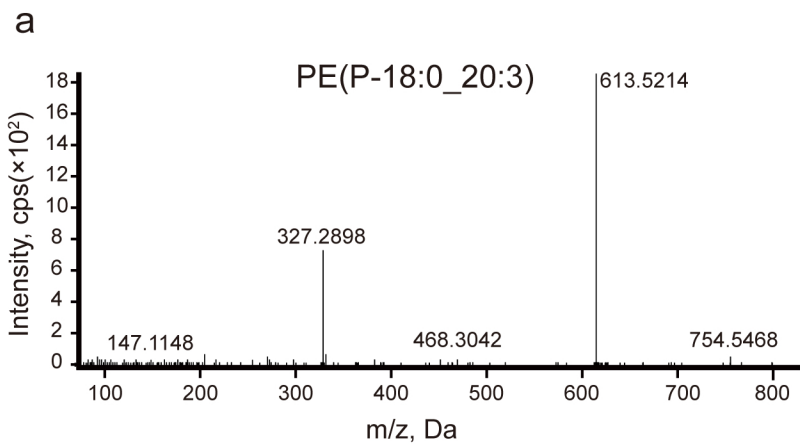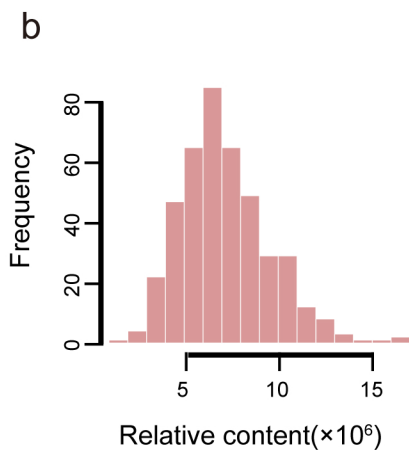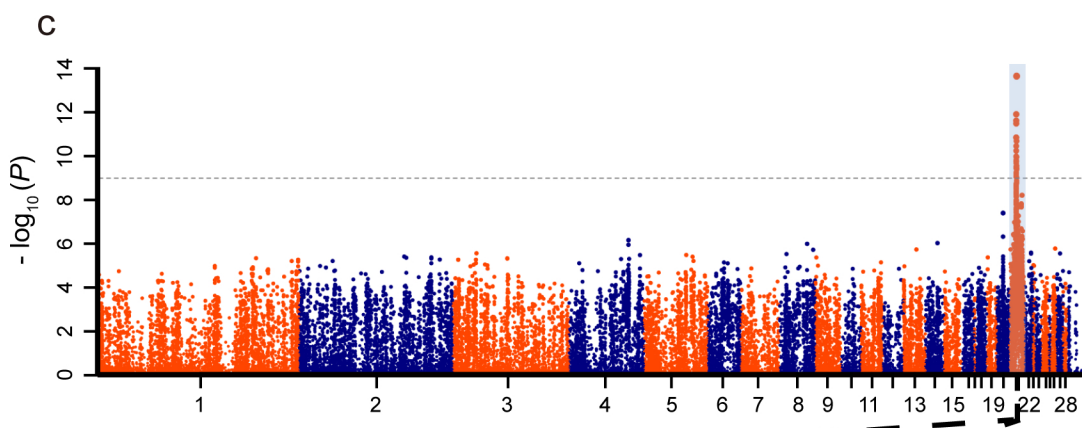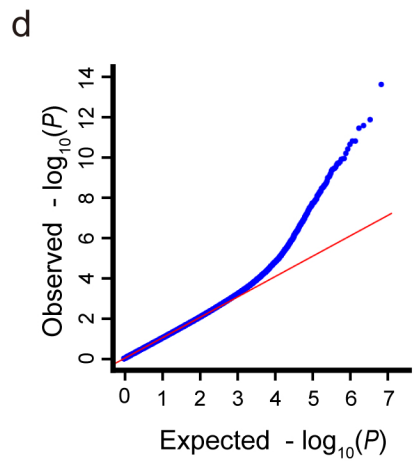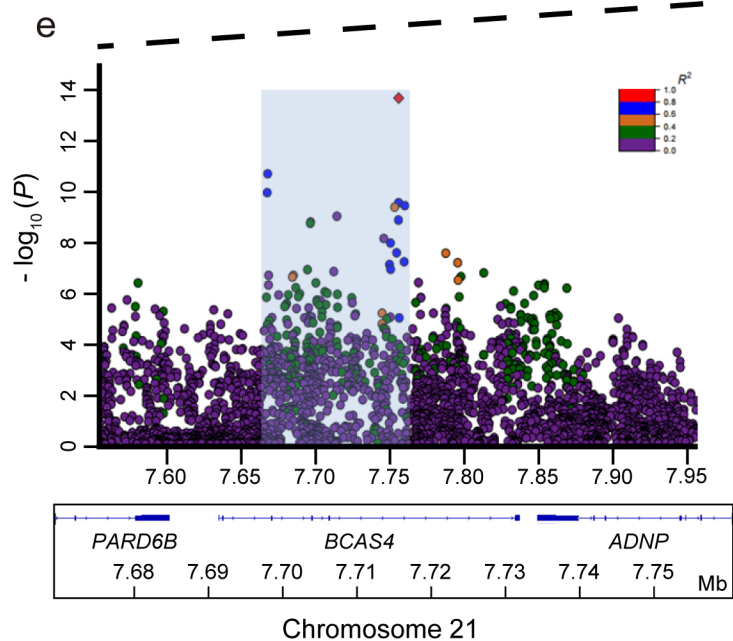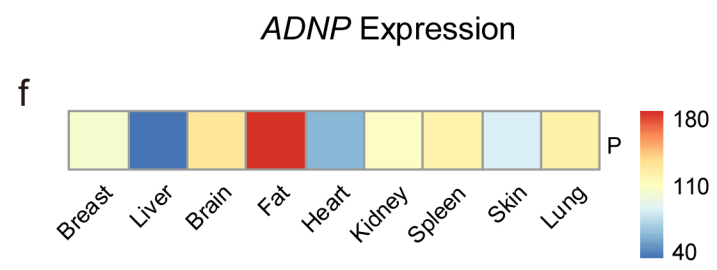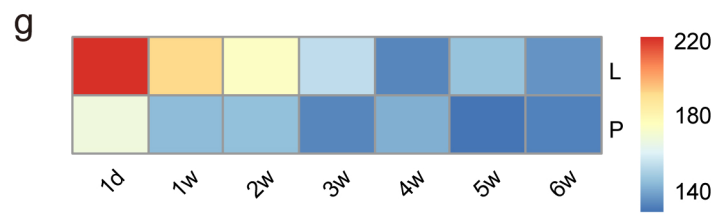

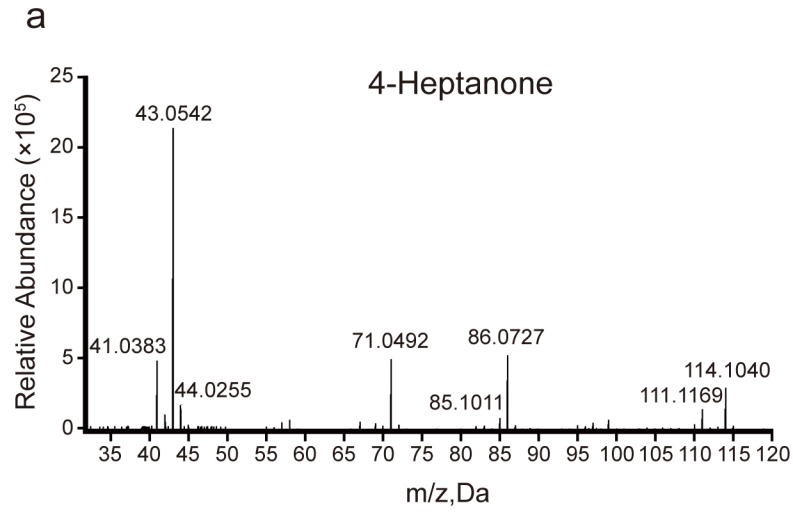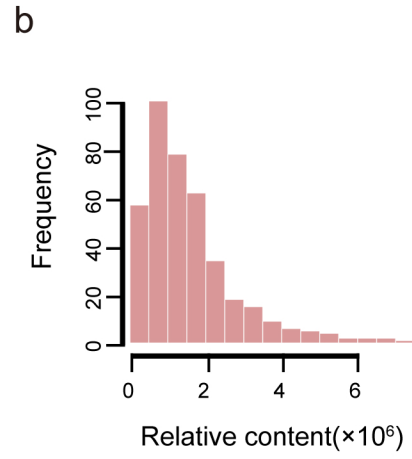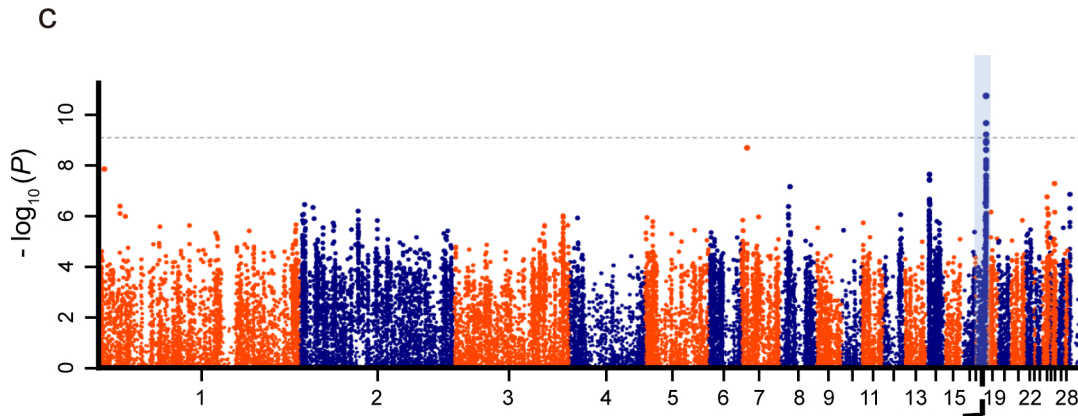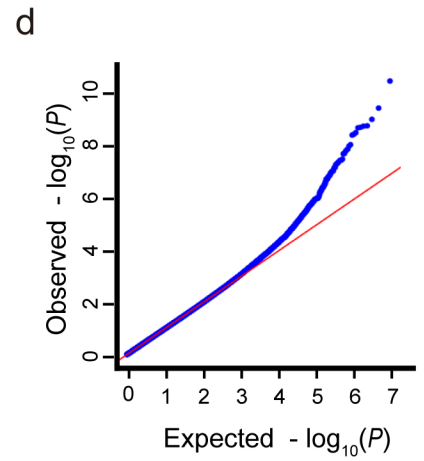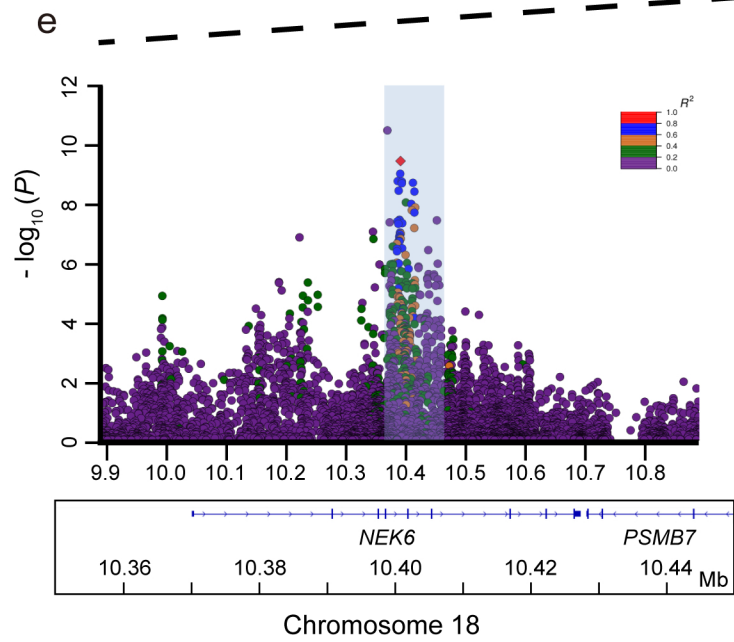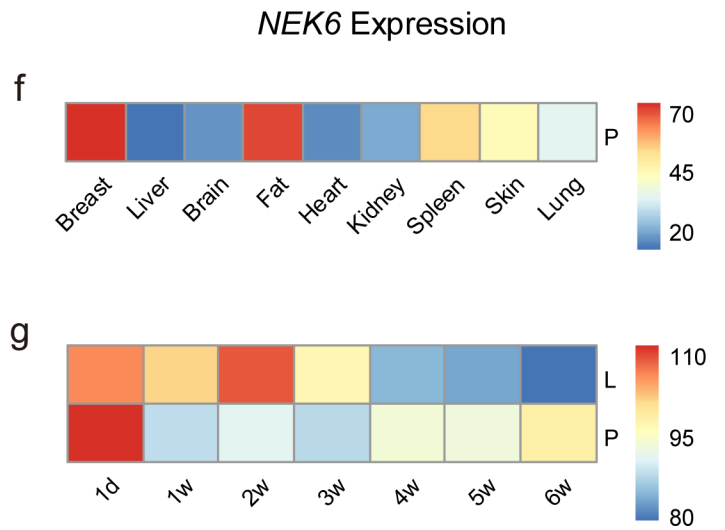

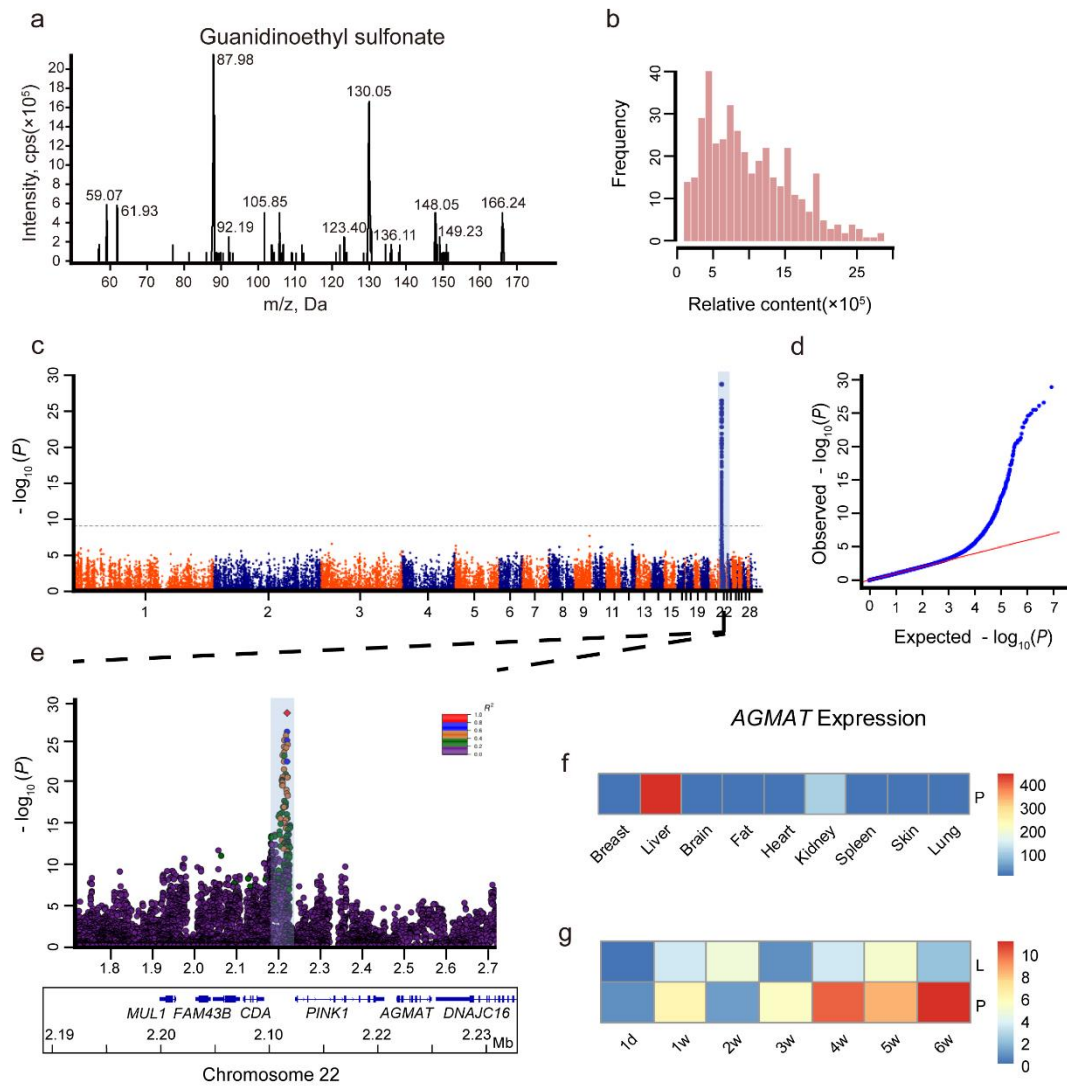

**Supplementary Figure 12** The mGWAS results identified 43 candidate genes modulating metabolites of potential muscle physiological or nutritional importance.

(a) A histogram of the phenotype in the population. (b) LC-MS/MS fragmentation of hydrophilic metabolites, lipids and volatiles. (c) Manhattan plots of mGWAS of hydrophilic metabolites, lipids and volatiles. (d) Q-Q plot of the expected null distribution and the observed p-value using the mixed linear model. (e) Regional plots for the candidate region based on mGWAS results. (f) Multi-tissue gene expression profiling in Pekin duck (P) and Mallard (M). (g) Gene expression profiling between Pekin duck (P) and Liancheng duck (L) at seven development stages. \*  $P < 0.05$ , \*\*  $P < 0.01$ , \*\*\*  $P < 0.001$ .

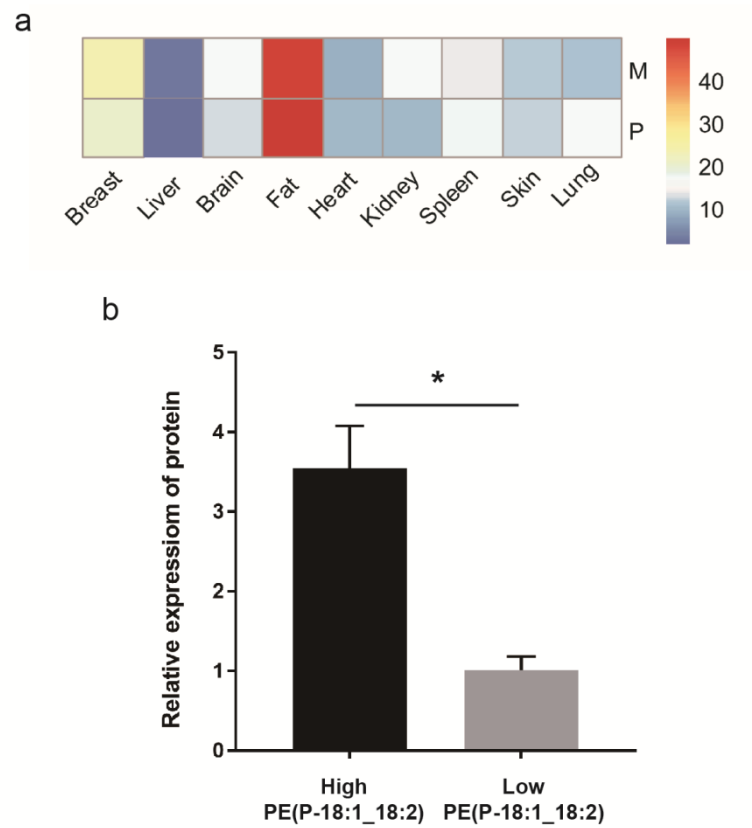

**Supplementary Figure 13** The levels of *TMEM189* gene and protein expression. (a) Multi-tissue of *TMEM189* gene expression profiling in Pekin duck (P) and Mallard (M). (b) Relative expression of *TMEM189* protein in the high PE (P-18:1\_18:2) and low PE (P-18:1\_18:2) content. \*  $P < 0.05$



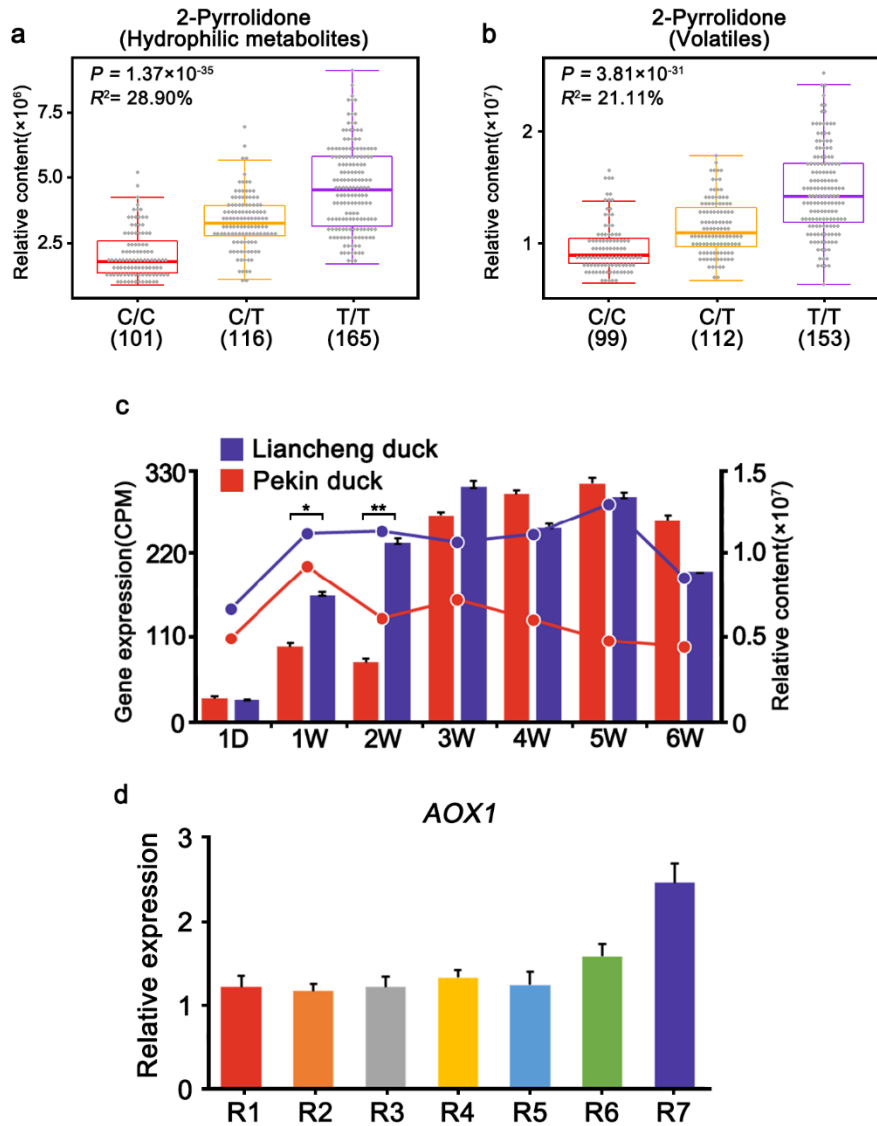

**Supplementary Figure 14** Box plot of 2-pyrrolidone content of three genotypes at SNP Chr7: 4,810,144 and *AOX1* gene expression at seven developmental stages.

(a) 2-pyrrolidone content in hydrophilic metabolites. (b) 2-pyrrolidone content in volatiles. (c) 2-Pyrrolidone (hydrophilic metabolite) content changes corresponding to differentially expressed *AOX1* at 7 developmental stages, Red bars refer to Pekin duck, purple bars refer to Liancheng duck, \*  $P < 0.05$ , \*\*  $P < 0.01$ . (d) The *AOX1* gene expression showed an increasing trend from R1 to R7.



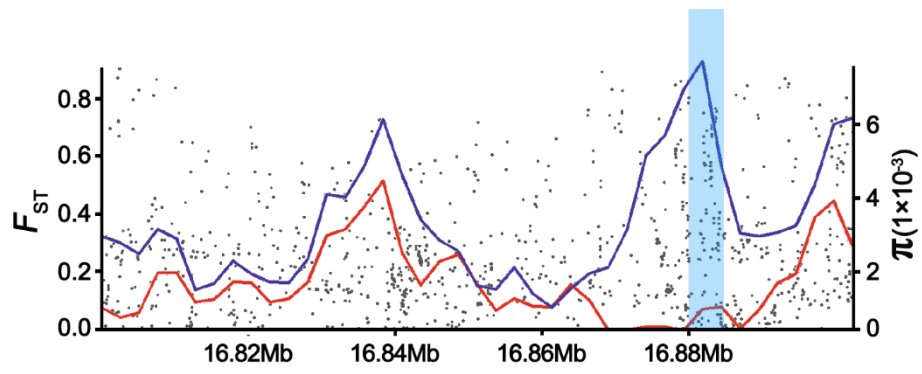

**Supplementary Figure 15** Fixation index ( $F_{ST}$ , gray dot) and ratio of nucleotide diversity ( $\pi$ , 5 kb window, 2.5 kb step) for Chr2: 16.80 Mbp-16.90 Mbp SNPs between Pekin duck (red line) and Liancheng duck (blue line).

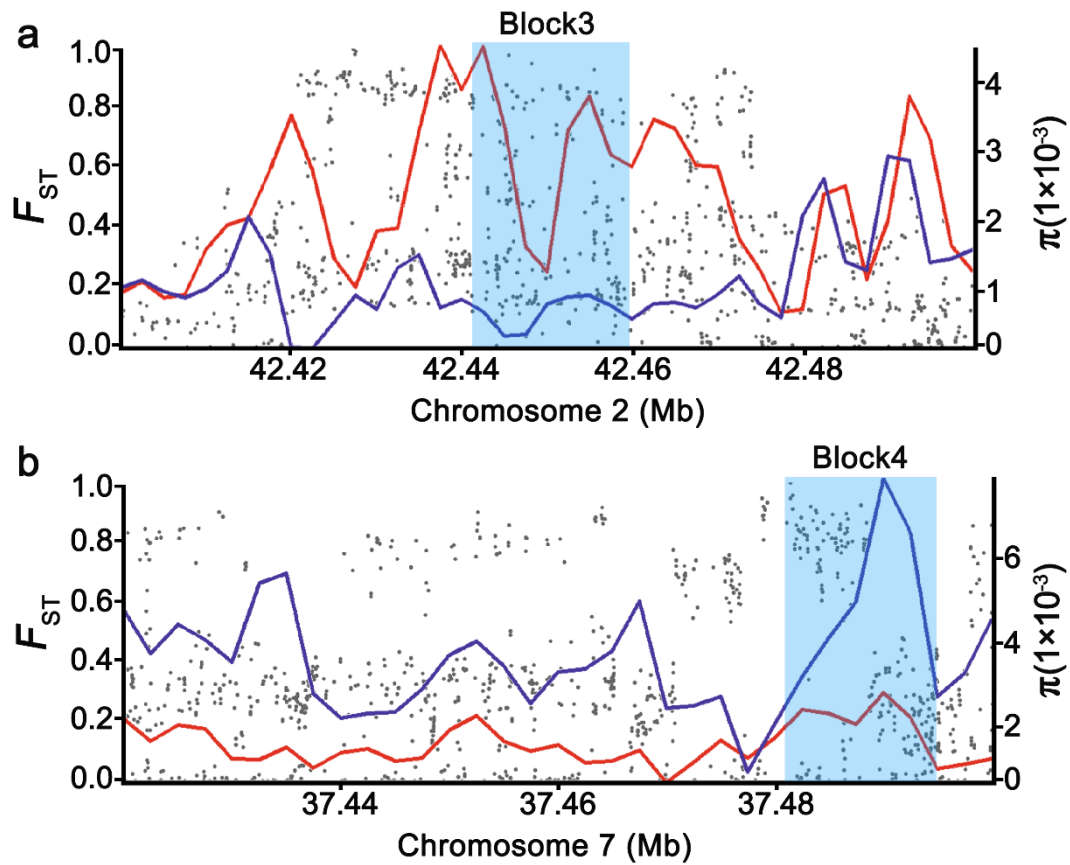

**Supplementary Figure 16** Fixation index ( $F_{ST}$ ) and ratio of nucleotide diversity ( $\pi$ , 5kb window, 2.5kb step) for candidate region of Chr2 and Chr7 between Pekin duck and Liancheng duck.

(a) The region of Chr2:42.40 Mbp-42.50 Mbp. (b) The region of Chr7:37.40 Mbp-37.52 Mbp. Fixation index ( $F_{ST}$ , grey dot), Pekin duck (red line) and Liancheng duck (blue line).

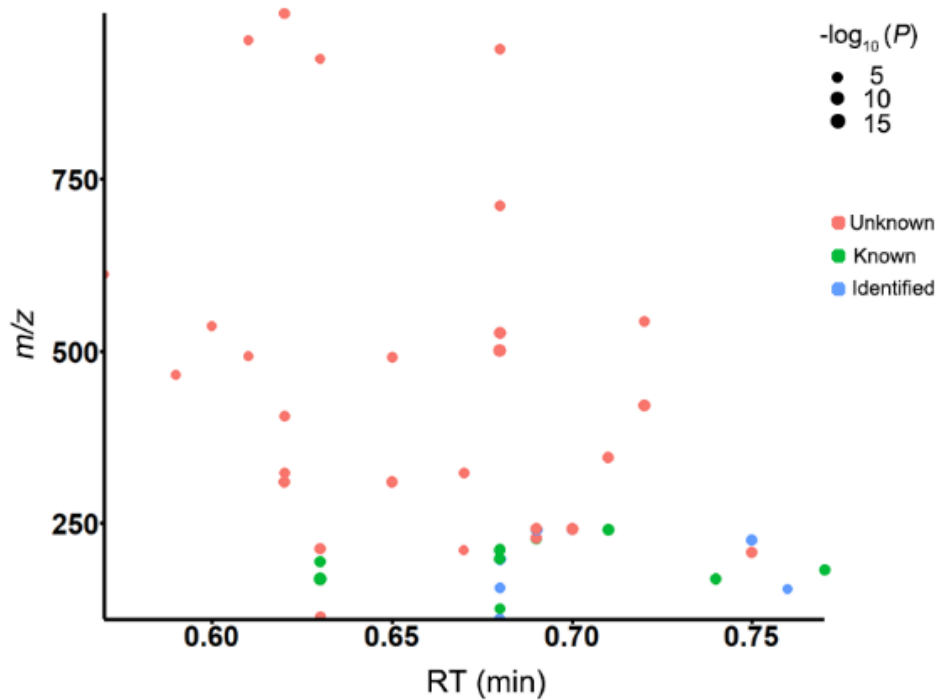

**Supplementary Figure 17** 49 carnosisine and related metabolites in the m/z–retention time (RT) plane, a group of unidentified features sharing the RT region with histidine and its derivatives.

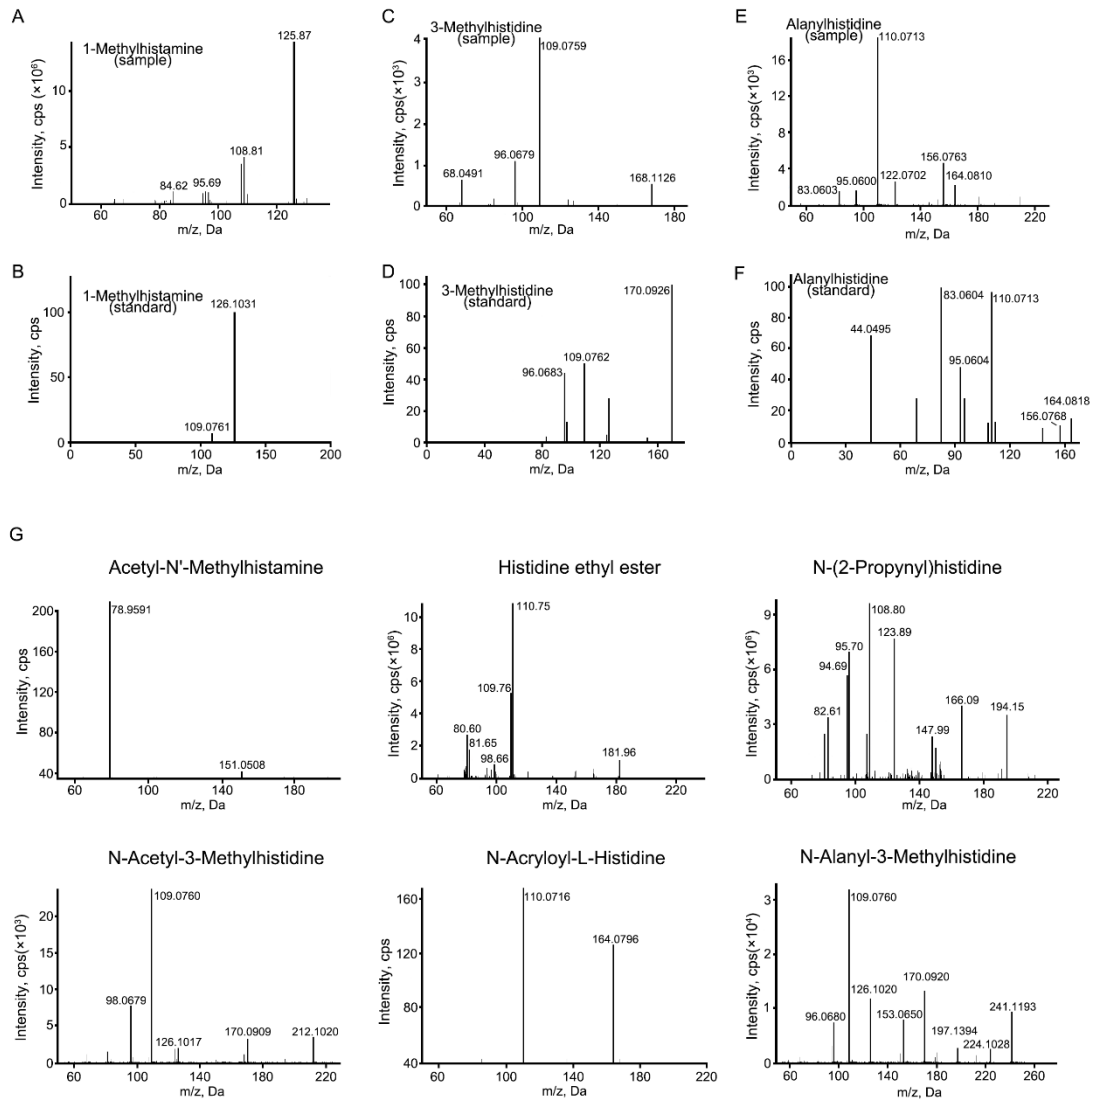

**Supplementary Figure 18** 9 unknown metabolites were annotated by mGWAS results and verified by high-resolution mass spectrometry.

(a)(b) Mass peak and spectrum of 1-Methylhistamine in meat sample and commercial standard. (c)(d) Mass peak and spectrum of 3-Methylhistidine in meat sample and commercial standard. (e)(f) Mass peak and spectrum of Alanylhistidine in meat sample and commercial standard. (g) Mass peak and spectrum of the other six unknown meatbolites.

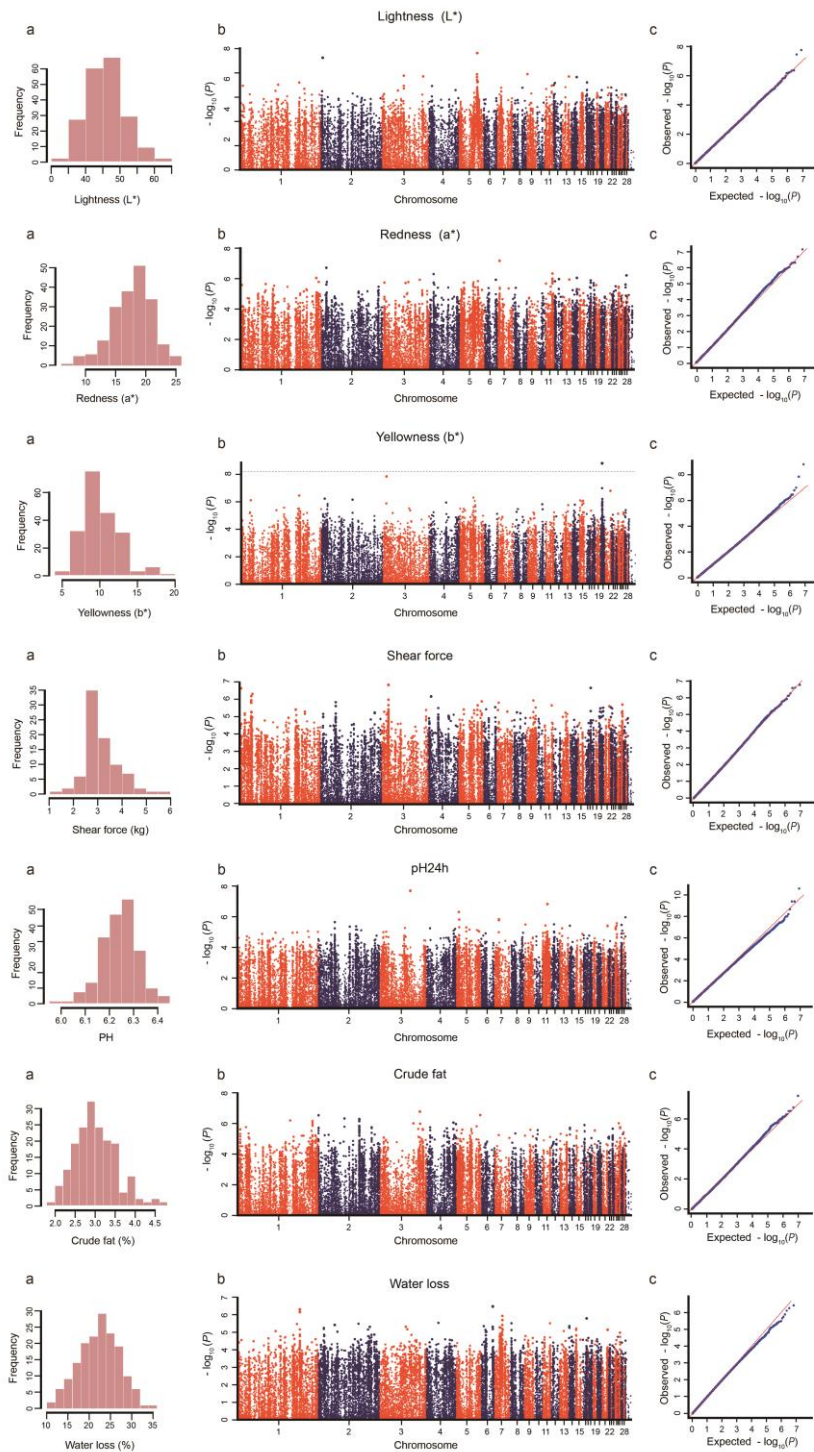

**Supplementary Figure 19** GWAS results of 7 meat quality traits (lightness ( $L^*$ ), redness ( $a^*$ ), yellowness ( $b^*$ ), shear force,  $pH_{24h}$ , crude fat, and water loss). (a) A histogram of the phenotype in this population. (b) Manhattan plots of GWAS results for meat quality traits. (c) Q-Q plot of the expected null distribution and the observed P value using the mixed linear model.

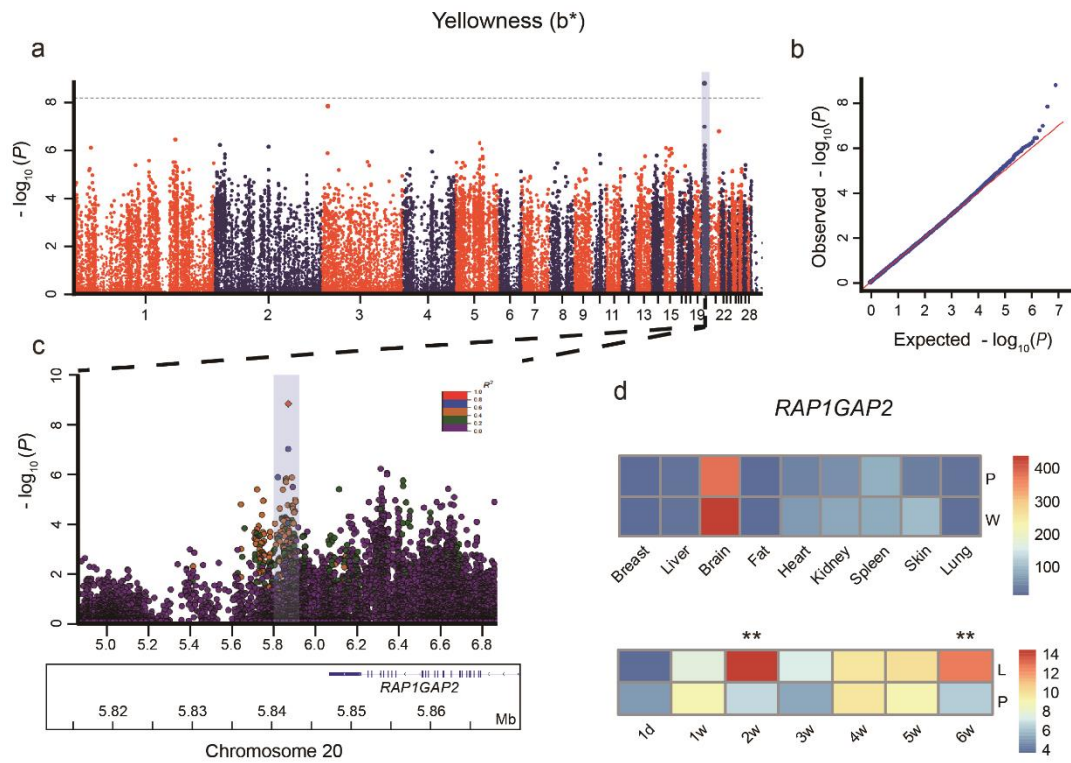

**Supplementary Figure 20** The GWAS results showed that *RAP1GAP2* was significantly associated with yellowness (b\*).

(a) Manhattan plots of mGWAS results for meat color (b\*). (b) Q-Q plot of the expected null distribution and the observed P value using the mixed linear model. (c) Regional plots for the candidate region based on GWAS results. (d) Multi-tissue *RAP1GAP2* gene expression in Pekin duck (P) and *RAP1GAP2* gene expression in Pekin duck (P) and Liancheng duck (L) at seven developmental stages. \*  $P < 0.05$ , \*\*  $P < 0.01$ , \*\*\*  $P < 0.001$ .

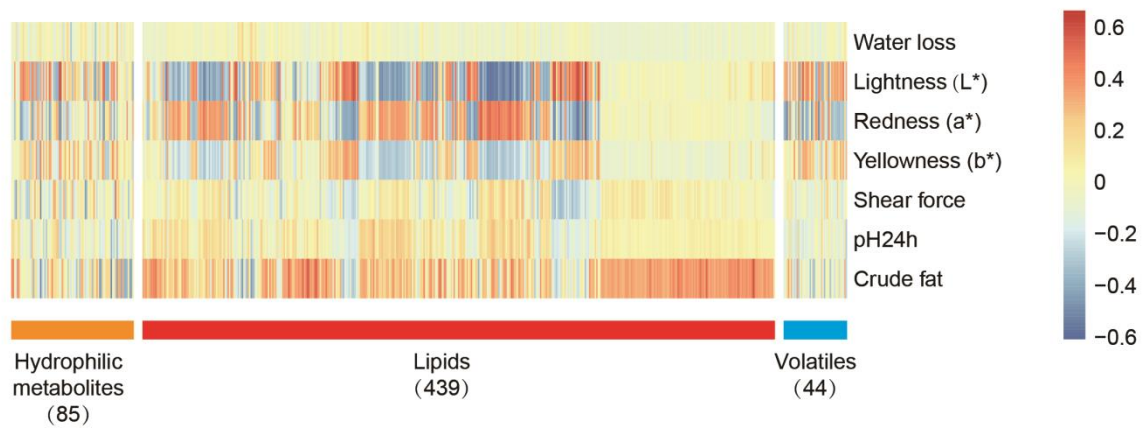

**Supplementary Figure 21** A heatmap depicting Pearson's correlation between metabolites and meat quality traits.

Correlation ( $r > 0.3$ , or  $r < -0.3$ ) between 7 meat quality traits (water loss, lightness (L\*), redness (a\*), yellowness (b\*), shear force, pH<sub>24h</sub>, and crude fat) and hydrophilic metabolites, lipids and volatiles.



## **Supplementary text**

### ***The detail procedure for meat quality phenotype determination***

#### **Meat color**

The meat color of duck breast including lightness ( $L^*$ ), redness ( $a^*$ ), and yellowness ( $b^*$ ) was obtained by measuring randomly 3 positions of each sample with chromameter (CR-400, Minolta Camera Co., Osaka, Japan). The measurement of each position was repeated three times to obtain an average value.

#### **PH<sub>24h</sub>**

The pH values of breast muscle were measured at 24 hours post mortem using a digital pH meter (HI99163, Dortmund, Italy). The pH detection probe was inserted into samples at a depth of 0.5 cm and the average pH value of each sample was calculated by taking 3 measurements in 3 different areas.

#### **Shear force**

Cooked breast meat samples were cut parallel to the direction of the muscle fibres, shaped to a size of 3 cm × 1 cm × 1 cm (length × width × thickness) and the shear force values of samples were measured using TA-XTplus texture analyzer (Texture Technologies Corp, Hamilton, MA, USA). Each sample was sheared in 2 areas to calculate the mean.

#### **Water loss**

The breast muscle was cut into 2 cm thick slices and squeezed under TA-XTplus texture analyzer (Texture Technologies Corp, Hamilton, MA, USA) to measure the weight of meat after squeezing. The result from each sample was recorded and water loss (WL) was calculated as:  $WL (\%) = (\text{original sample weight} - \text{squeezed sample weight}) (\text{g}) / \text{original meat weight} (\text{g}) \times 100$ .

#### **Crude fat**

The routine Soxhlet extractor method was utilized to measure the crude fat of the breast muscle. All breast muscle samples were dried in the freeze dryer and then grinded into powder. Subsequently, approximately 1.0 g of each muscle powder sample was wrapped with a marked filter paper and placed in the extraction tube of the Soxhlet

extractor. Afterwards, 100 mL of petroleum ether was added into each extraction tube and samples was extracted at 70 °C for 12 hours. Finally, the samples were baked in an oven at 105 °C for 4 h and then weighed to determine the fat weight. The percentage of crude fat was calculated in the absolute dry state of the sample.
